1  
2  
3  
4  
5  
6  
7  
8  
9  
10  
11  
12  
13  
14  
15  
16  
17  
18  
19  
20  
21  
22  
23  
24  
25  
26  
27  
28  
29  
30

**DAAM mediates the assembly of long-lived, treadmilling stress fibers  
in collectively migrating epithelial cells in *Drosophila***

Kristin M Sherrard<sup>1</sup>, Maureen Cetera<sup>2,3</sup>, and Sally Horne-Badovinac<sup>1,2,\*</sup>

**Affiliations:**

<sup>1</sup>Department of Molecular Genetics and Cell Biology, The University of Chicago.

<sup>2</sup>Committee on Development, Regeneration, and Stem Cell Biology, The University of Chicago.

<sup>3</sup>Current address: Department of Genetics, Cell Biology and Development, University of Minnesota.

\*Correspondence to: [shorne@uchicago.edu](mailto:shorne@uchicago.edu).

31 **ABSTRACT**

32 Stress fibers (SFs) are actomyosin bundles commonly found in individually migrating cells in  
33 culture. However, whether and how cells use SFs to migrate *in vivo* or collectively is largely  
34 unknown. Studying the collective migration of the follicular epithelial cells in *Drosophila*, we  
35 found that the SFs in these cells show a novel treadmilling behavior that allows them to persist  
36 as the cells migrate over multiple cell lengths. Treadmilling SFs grow at their fronts by adding  
37 new integrin-based adhesions and actomyosin segments over time. This causes the SFs to  
38 have many internal adhesions along their lengths, instead of adhesions only at the ends. The  
39 front-forming adhesions remain stationary relative to the substrate and typically disassemble as  
40 the cell rear approaches. By contrast, a different type of adhesion forms at the SF's terminus  
41 that slides with the cell's trailing edge as the actomyosin ahead of it shortens. We further show  
42 that SF treadmilling depends on cell movement and identify a developmental switch in the  
43 formins that mediate SF assembly, with DAAM acting during migratory stages and Diaphanous  
44 acting during post-migratory stages. We propose that treadmilling SFs keep each cell on a  
45 linear trajectory, thereby promoting the collective motility required for epithelial migration.

## 46 INTRODUCTION

47 Migrating cells rely on dynamic networks of filamentous actin (F-actin) for their motility. For cells  
48 migrating on two-dimensional substrates, these include the branched networks that underly  
49 lamellipodial protrusions (Ridley, 2011) and the stress fibers (SFs) that mediate much of the  
50 cell's interaction with the extracellular matrix (ECM). SFs are prominent F-actin bundles that  
51 have been categorized into different types based on their origin, subcellular location, and how  
52 they interact with non-muscle myosin II and integrin-based focal adhesions (BurrIDGE and  
53 GuILLUY, 2016; BurrIDGE and WITTCHE, 2013; Naumanen et al., 2008; Tojkander et al., 2012;  
54 Vallenius, 2013). The most studied SF types have myosin along their lengths and large focal  
55 adhesions at either end; these include ventral SFs (Hotulainen and Lappalainen, 2006;  
56 Tojkander et al., 2015) and the recently defined cortical SFs (Lehtimäki et al., 2021). SFs play  
57 key roles in focal adhesion maturation, defining the cell's front-rear axis, retraction of the trailing  
58 edge, and sensing the mechanical properties of the ECM (Lehtimäki et al., 2017; Livne and  
59 Geiger, 2016; Schwartz, 2010). However, our current knowledge of SFs in migrating cells  
60 comes almost entirely from studies of individual cells on non-native substrates. Whether and  
61 how cells use SFs to migrate *in vivo* or as part of a collective is largely unknown.

62  
63 In this study, we use an *in vivo* system, the *Drosophila* egg chamber, to probe SF dynamics in  
64 collectively migrating epithelial cells (Cetera and Horne-Badovinac, 2015; Horne-Badovinac and  
65 Bilder, 2005). An egg chamber is an ovarian follicle that will give rise to one egg. It consists of a  
66 germ cell cluster surrounded by a somatic follicular epithelium (Figure 1A). During early stages  
67 of oogenesis, the follicle cells' basal surfaces crawl along the basement membrane ECM that  
68 that encapsulates the egg chamber (Cetera et al., 2014; Lewellyn et al., 2013). This causes the  
69 entire egg chamber to rotate within the basement membrane, which itself remains stationary  
70 (Haigo and Bilder, 2011). During this migration, each follicle cell has actin-based protrusions at  
71 its leading edge and a parallel array of SFs across its basal surface that are oriented in the  
72 direction of tissue movement (Cetera et al., 2014; Gutzeit, 1991) (Figure 1B). At later stages  
73 when the follicle cells have stopped migrating, the density of SFs across the basal surface  
74 increases (Delon and Brown, 2009; Gutzeit, 1991, 1990), and their contractile activity helps to  
75 create the elongated shape of the egg (Campos et al., 2020; He et al., 2010).

76  
77 Here we show that the SFs in the follicle cells have many internal adhesions along their lengths,  
78 in addition to adhesions at the ends. We further show that these SFs undergo a novel

79 treadmill behavior that allows them to persist as the cell migrates over more than one cell  
80 length. Treadmilling SFs grow at their fronts by adding new adhesions and actomyosin  
81 segments over time. These front-forming adhesions remain stationary relative to the substrate,  
82 transition to being internal adhesions, and typically disassemble as the cell rear approaches. By  
83 contrast, a different type of adhesion forms at the SF terminus that appears to slide with the  
84 cell's trailing edge as the actomyosin segment ahead of it shortens. Blocking migration causes  
85 the internal adhesions to disappear and the treadmill behavior to stop, which shows that the  
86 modular SF architecture depends on cell movement. We further identify a developmental switch  
87 in the formins required for SF assembly, with Disheveled-associated activator of morphogenesis  
88 (DAAM) contributing to treadmill SFs during migratory stages and Diaphanous (Dia)  
89 contributing to the more canonical SFs that form once migration has ceased. We propose that  
90 treadmill SFs ensure that each epithelial cell maintains a linear trajectory and thereby  
91 promote the highly orchestrated collective motility required for tissue-scale movement.

92

## 93 **RESULTS**

### 94 **Migrating follicle cells have long-lived, treadmill SFs**

95 To visualize SF dynamics in living follicle cells, we used GFP-tagged and mCherry (mCh)-  
96 tagged versions of the regulatory light chain of myosin II (MRLC, Spaghetti Squash in  
97 *Drosophila*) (Figure 2A) and near total internal fluorescence (near-TIRF) microscopy (Movie S1).  
98 Live actin labels are less effective markers because they strongly label leading-edge  
99 protrusions, which obscures the SF tips; they can also disrupt F-actin organization (Figure S1A-  
100 D). This imaging strategy allowed us to watch SFs appear and disappear over time as the  
101 follicle cells migrated. Appearance of a new SF is marked by a rapid coalescence of MRLC  
102 (Figure 2B). SFs disappear either by fading along their lengths or by contracting rapidly from the  
103 rear (Figure 2C).

104

105 We measured SF lifetimes by identifying individual SFs at the mid-point of a 60-minute movie  
106 and tracking their behavior over the full imaging period (Figure 2D). Only actomyosin fibers that  
107 spanned at least half the cell's length were tracked. Through this assay, we determined that  
108 these SFs have a half-life of 34 minutes. This is clearly an underestimate, however, as only 60%  
109 of SFs both appeared and disappeared during the 60 minute window. For 32% of SFs, we saw  
110 either their appearance or disappearance but not both. The remaining 8% persisted for the  
111 entire 60 minutes. We then used the same dataset to analyze the relationship between SF

112 lifetimes and the distance travelled by the cell. The follicle cells migrated a mean distance of  
113 16.8  $\mu\text{m}$  in this assay, corresponding to a mean of 2.2 cell lengths. Strikingly, 62% of SFs  
114 persisted for longer than the time required for the cell to travel at least one cell length (Figure  
115 2E). Given that SFs are attached to an immobile substrate by integrin-based adhesions, we  
116 reasoned that the entire actomyosin fiber must be treadmilling (i.e., growing at the front and  
117 shrinking at the back). Indeed, new actomyosin segments are added to the front of existing SFs  
118 (Figures 2F-2H, S1E-S1F, and Movie S2), which explains their persistence. Hereafter we refer  
119 to these long-lived SFs as “treadmilling SFs”.

120

### 121 **Treadmilling SFs have many adhesions along their lengths**

122 To understand the treadmilling behavior of the SFs, we examined their associated integrin-  
123 based adhesions. Previous descriptions of these adhesions in follicle cells primarily focused on  
124 later stages of egg chamber development (Delon and Brown, 2009), after the follicle cells have  
125 ceased migrating. At these later stages, the SFs are increased in density across the basal  
126 surface, and they exhibit the canonical organization with large focal adhesions at their ends  
127 (Figure 3A and 3H). By contrast, the SFs present during migratory stages have many smaller  
128 adhesions along their lengths (Figures 3B-3H, S2) (Cetera et al., 2014), with an average of 5.5  
129 adhesions per SF. This phenomenon is easiest to see when Paxillin-GFP is overexpressed  
130 (UAS-Pax-GFP); however, we also see multiple adhesions with endogenous GFP tags on  
131 Paxillin, Talin, and the  $\beta\text{PS}$ -integrin subunit, Myospheroid. Thus, the SFs in migrating follicle  
132 cells have internal adhesions, in addition to adhesions at their ends.

133

### 134 **Adhesions are added to the front and removed near the back of treadmilling SFs**

135 To determine how the internal adhesions relate to the treadmilling behavior we saw with MRLC,  
136 we imaged epithelia in which MRLC was expressed in all cells and UAS-Pax-GFP was  
137 expressed in a subset of cells (Figures 4A-4D and Movie S3). This allowed us to identify an  
138 individual SF using the MRLC signal and then watch the adhesions appear and disappear with  
139 the Paxillin signal. Kymographs of individual SFs showed that new adhesions are continuously  
140 added to the front of a SF over time (Figure 4A). A front-forming adhesion typically first appears  
141 near the cell's leading edge and grows in brightness as an actomyosin segment coalesces  
142 behind it to link the new adhesion to an existing SF (Figure 4C). New adhesions are also pulled  
143 slightly rearward, consistent with their maturing under tension. The front-forming adhesions then  
144 remain stationary relative to the basement membrane substrate.

145

146 We noted that a different type of adhesion forms at the back of the cell. For 82% of the SFs  
147 analyzed, the final adhesion at the SF terminus appears to slide along the substrate at the same  
148 speed that the cell migrates (Figures 4A and 4D). Sliding adhesions can arise from stationary  
149 adhesions; however, 80% arise *de novo* near the cell's trailing edge. Sliding adhesions are  
150 remarkably long-lived, persisting for a mean of 34 minutes, which corresponds to the time  
151 required for a cell to migrate 1.2 cell lengths. By contrast, stationary adhesions persist for only a  
152 mean of 13 minutes (Figure 4E). Stationary adhesions typically disassemble before they reach  
153 the cell's trailing edge. However, ~20% of stationary adhesions are subsumed by sliding  
154 adhesions (Figure 4D and Movie S4). We observed that 74% of sliding adhesions merged with  
155 at least one stationary adhesion, which may account for their long lifetimes.

156

157 In summary, a treadmilling SF grows at its front by incorporating new adhesions and new  
158 actomyosin segments over time. These front-forming adhesions remain stationary relative to the  
159 substrate and typically disassemble as the cell rear approaches. By contrast, a sliding adhesion  
160 forms at the SF terminus that appears to move with the cell's trailing edge as the actomyosin  
161 segment in front of it shortens (Figure 4F).

162

### 163 **The modular architecture and treadmilling behavior of the SFs depends on cell migration**

164 Because new adhesions are added to the front of a treadmilling SF as the cell's leading-edge  
165 advances, it seemed likely that the treadmilling behavior would depend on cell movement. We  
166 blocked follicle cell migration by employing two methods that eliminate leading-edge F-actin  
167 networks in these cells, inhibition of Arp2/3 by CK-666, and depletion of the Scar/WAVE  
168 complex with RNAi against Abelson interacting protein (*Abi RNAi*). Analysis of fixed samples  
169 revealed that both treatments cause SFs to adopt a canonical SF architecture, in which the  
170 adhesions become concentrated at the ends (Figure 5A).

171

172 We then used live imaging to explore how this structural transition occurs. Following addition of  
173 CK-666, the follicle cells gradually come to a stop. The internal adhesions disappear over time  
174 as the end adhesions grow and myosin becomes concentrated in the center (Figure 5B and  
175 Movie S5). Once this transition is complete, individual SFs often contract from both ends toward  
176 the center and disappear; new adhesions are never added to their ends (Figure 5C).

177

178 The transition from a modular to a canonical SF architecture could be due to loss of cell  
179 migration; however, it could also be due to loss of some other activity that depends on the

180 Scar/WAVE complex. To distinguish between these possibilities, we examined SFs in clones of  
181 cells expressing RNAi against the *Abi* or *Sra1* components of the Scar/WAVE complex. These  
182 mosaic epithelia retain the ability to migrate because the RNAi-expressing cells are carried  
183 along by their wild-type neighbors (Cetera et al., 2014). Importantly, the SFs within the RNAi-  
184 expressing clones show the same modular architecture and treadmilling behavior as wild-type  
185 SFs (Figures 5D and 5E). We therefore conclude that it is migration itself, not the activity of the  
186 Scar/WAVE complex, that is necessary to generate treadmilling SFs.

187

### 188 **DAAM mediates the assembly of treadmilling SFs**

189 To better understand how treadmilling SFs are built, we sought to identify the source of their F-  
190 actin. We first considered that branched F-actin networks flowing back from leading edge  
191 lamellipodia could be incorporated into the SFs. However, elimination of leading-edge F-actin  
192 networks through depletion of the Scar/WAVE complex did not reduce F-actin levels in the SFs  
193 (Figures 6A, 6D, S3A and S3C). This is also true for cells depleted of Enabled, which builds  
194 leading-edge filopodia (Figures S3B and S3C) (Cetera et al., 2014). Hence, the leading edge is  
195 not a major source of F-actin for the SFs.

196

197 We next asked if formins are required, as these proteins assemble unbranched F-actin and are  
198 often associated with SF formation (Kühn and Geyer, 2014; Valencia and Quinlan, 2021). We  
199 performed an RNAi-based screen of *Drosophila* formins and found that depleting DAAM  
200 reduces F-actin levels in the SFs by ~30% (Figures S3D, 6B and 6D). We confirmed this result  
201 by showing that two null alleles of *DAAM* similarly reduce F-actin in the SFs without having  
202 obvious effects on other F-actin populations (Figure 6B, 6D and 6E). An activated form of DAAM  
203 increases F-actin in the SFs, but this effect is not statistically significant (Figure 6C). RNAi  
204 against other formins had no effect on the SFs, nor did co-depleting formins or other F-actin  
205 assembly factors with DAAM (Figures S3D and S3E). It is important to note, however, that we  
206 do not know that all the formin RNAi transgenes we screened are functional. From these data,  
207 we conclude that DAAM is a key contributor to treadmilling SF assembly.

208

209 Finally, we asked how DAAM contributes to treadmilling SFs. Using a line in which DAAM is  
210 endogenously tagged with GFP (DAAM-GFP) (Molnár et al., 2014), we found that DAAM  
211 localizes largely uniformly within the cortex with no obvious enrichment on SFs or adhesions  
212 (Figure 7A and 7B). DAAM-depleted cells have the same density of SFs across their basal  
213 surfaces as control cells (Figure 7C, 7D); each SF simply has reduced levels of F-actin, myosin,

214 and the focal adhesion protein Talin (Figures 7E, 7F). These findings suggest that DAAM-  
215 depleted cells may adhere less well to the ECM. We previously showed that a mild reduction in  
216 cell-ECM adhesion increases the speed of follicle cell migration (Lewellyn et al., 2013).  
217 Similarly, mean migration rates for DAAM-depleted epithelia are faster than for control epithelia  
218 (Figure 7G). Altogether, these data suggest that DAAM contributes to the assembly and/or  
219 maintenance of treadmilling SFs by adding new F-actin along their lengths, and/or by  
220 contributing F-actin to the basal cortex, and that this additional F-actin strengthens cell-ECM  
221 adhesion.

222

### 223 **There is a developmental switch in the formins that build treadmilling vs. canonical SFs**

224 One striking feature of the SFs in the follicle cells is that they change in both structure and  
225 function between early developmental stages when they mediate collective cell migration and  
226 later stages when their contractility helps to create the elongated shape of the egg, so we next  
227 investigated the molecular mechanisms that underly this transition. We found that DAAM is  
228 downregulated after follicle cell migration has ceased (Figure 8A). This observation suggested  
229 that DAAM might mediate the formation of treadmilling SFs in migratory cells but not the more  
230 canonical SFs that form at later stages. To test this idea, we used traffic jam-Gal4 to express  
231 *DAAM RNAi* in the follicle cells throughout oogenesis. This reduces F-actin in the treadmilling  
232 SFs as expected. During post-migratory stages, however, F-actin levels in the SFs are  
233 unaffected (Figure 8B). Thus, DAAM selectively contributes to the formation of treadmilling SFs.

234

235 Previous work suggested that the formin Diaphanous (Dia) is required for SF assembly in the  
236 follicle cells (Delon and Brown, 2009; Popkova et al., 2020). However, when we depleted Dia  
237 during migratory stages as part of our RNAi screen, the treadmilling SFs were unaffected  
238 (Figures 8C and S3D). We know Dia was depleted because the RNAi-expressing clones  
239 contained multi-nucleated cells, consistent with Dia's role in cytokinesis. To ask if Dia selectively  
240 mediates canonical SF assembly during post-migratory stages, we expressed *Dia RNAi* using  
241 Cy2-Gal4, which initiates expression after cell divisions and cell migration have both ceased.  
242 This condition largely eliminates SFs from post-migratory cells, while similarly expressing *DAAM*  
243 *RNAi* does not (Figures 8D and 8E). These data show that there is a developmental switch in  
244 the formins that mediate SF assembly in the follicle cells, with DAAM contributing to treadmilling  
245 SFs during migratory stages and Dia contributing to the canonical SFs that form after migration  
246 is complete.

247

248



## 249 DISCUSSION

250  
251 SFs are a common and well-studied feature of cells migrating on non-native substrates *in vitro*.  
252 However, whether and how cells use SFs to migrate on their native substrates *in vivo* remains  
253 largely unexplored. Focusing on the follicular epithelial cells of *Drosophila*, we found that their  
254 SFs display a novel treadmilling behavior that allows individual SFs to persist as the cells  
255 migrate over more than one cell length. The discovery of these long-lived contractile structures  
256 has important implications for our understanding of SF dynamics, the influence that different SF  
257 types can have on cell motility, and how SF structure and function can change as a tissue  
258 develops, each of which is discussed below.

259  
260 We found that SFs in migrating follicle cells have internal adhesions along their lengths, in  
261 addition to adhesions at the ends. These internal adhesions are key to the treadmilling behavior.  
262 When a new adhesion and actomyosin segment are added to the front of an existing SF, the  
263 previous front adhesion becomes an internal adhesion. In this way, the formation of internal  
264 adhesions depends on treadmilling. Once formed, the internal adhesions then contribute to  
265 treadmilling by generating the modular SF architecture needed for older stationary adhesions to  
266 be disassembled near the cell's rear and allow the back of the SF to shorten. To our knowledge  
267 this is the first study to focus on the role of internal adhesions in SF dynamics, but there are  
268 hints in the literature that these structures may exist in other cells. For example, SFs isolated  
269 from human foreskin fibroblasts and bovine endothelial cells have small puncta of the focal  
270 adhesion protein vinculin along their lengths in addition to prominent vinculin puncta at their  
271 ends (Kato et al., 1998), and the cortical SFs in cultured mesenchymal cells were sometimes  
272 observed to have more than two adhesions (Lehtimäki et al., 2021). Internal adhesions have  
273 also been invoked as a possible explanation for the buckling pattern observed when SFs are  
274 rapidly compressed (Costa et al., 2002; Kassianidou and Kumar, 2015). Because internal  
275 adhesions are attached to two aligned actomyosin segments, they likely experience more  
276 balanced pulling forces than end adhesions, which may affect their composition and/or  
277 organization. It is also likely, however, that there is still higher tension on one side of the  
278 adhesion due to forces exerted by cell movement. Determining the extent to which internal  
279 adhesions are found in other cell types and how they differ from end adhesions represent  
280 important areas for future research.

281  
282 A treadmilling SF grows at its front when a new adhesion and new actomyosin segment appear  
283 nearly simultaneously ahead of the foremost adhesion. How do these new elements arise? We

284 envision that the new actomyosin segment captures a nearby nascent adhesion that has formed  
285 just behind the cell's leading edge, and that this activity both links the nascent adhesion to the  
286 existing SF and induces it to mature. Our finding that DAAM is required for robust SF formation  
287 also suggests two hypotheses for the source of the F-actin for the new actomyosin segment.  
288 One possibility is that DAAM localizes to nascent and mature adhesions, causing actin filaments  
289 to grow out from these sites, like the role ascribed to Dia in dorsal SF formation (Hotulainen and  
290 Lappalainen, 2006; Oakes et al., 2012; Tojkander et al., 2011). Bundling of the DAAM-generated  
291 filaments by myosin could then link the nascent adhesion to the mature adhesion. Alternatively,  
292 DAAM could play a more general role in contributing F-actin to the basal cortex (Chugh and  
293 Paluch, 2018), with local pulses of myosin activity near the cell's leading-edge condensing the  
294 cortical F-actin meshwork to form the new actomyosin segment. We favor the second model for  
295 two reasons. First, DAAM is found throughout the cortex with no obvious enrichment at  
296 adhesions. Second, treadmilling SFs closely resemble other SF types that arise from the cortex  
297 and/or are embedded within it (Lehtimäki et al., 2021; Svitkina, 2020; Vignaud et al., 2020), as  
298 they lie so flat against the basal surface that we can visualize them with near-TIRF microscopy.  
299 This contrasts with ventral SFs whose center can arch away from the migratory surface.  
300 However, future work will be required to distinguish between these possibilities.

301  
302 A treadmilling SF shrinks at its back using a mechanism involving an adhesion that slides along  
303 the substrate as the actomyosin segment in front of it shortens. These rear-most sliding  
304 adhesions are strikingly similar to those found in individual migrating cells in culture (Ballestrem  
305 et al., 2001; Digman et al., 2008; Laukaitis et al., 2001; Rid et al., 2005; Smilenov et al., 1999;  
306 Wehrle-Haller and Imhof, 2003), in that they primarily form near the cell's trailing edge and then  
307 track with its movement. In migrating cells, sliding adhesions have been proposed to act as  
308 rudders that help to steer the cell (Rid et al., 2005). In stationary cells, sliding adhesions can  
309 also remodel the ECM (Lu et al., 2020; Zamir et al., 2000). Given that one of the purposes of  
310 follicle cell migration is to polarize the basement membrane ECM over which they move  
311 (Gutzeit, 1991; Haigo and Bilder, 2011; Isabella and Horne-Badovinac, 2016), it is interesting to  
312 speculate that sliding adhesions could function in both roles in these cells.

313  
314 The modular architecture and unidirectional growth of a treadmilling SF both depend on cell  
315 movement. We found this relationship by comparing two conditions that eliminate leading-edge  
316 protrusions. In one condition, we eliminated protrusions from a clone of cells. Here, the  
317 epithelium continues to migrate, carrying the non-protrusive cells along for the ride (Cetera et

318 al., 2014). The SFs in the clone are indistinguishable from those in wild-type cells, showing that  
319 protrusive F-actin networks are not required for treadmilling SFs to form. In the other condition,  
320 we eliminated protrusions from the entire tissue, which does block epithelial migration. Here, the  
321 SFs transition to having large adhesions only at their ends, but they are not stationary. Instead,  
322 when a new SF forms, it continuously shortens toward the middle until it disappears with no new  
323 material added to the ends. This movement is reminiscent of the way a treadmilling SF normally  
324 shortens at its rear, except that it happens from both ends. This raises the possibility that these  
325 SFs have lost their polarity and have two “backs”. If true, studies of these aberrant SF dynamics  
326 could help to reveal how a treadmilling SF becomes polarized for unidirectional movement.

327

328 We propose that treadmilling SFs may be particularly well suited to mediate the collective  
329 migration of epithelial cells. Cells that migrate as individuals can undergo frequent turns as they  
330 explore their environment. By contrast, each follicle cell follows a roughly linear trajectory over  
331 its entire migratory period, which can last for up to two days of egg chamber development  
332 (Cetera et al., 2014; Horne-Badovinac and Bilder, 2005). The follicle cells use intercellular  
333 signaling to align all their front-rear axes in the same direction across the tissue (Barlan et al.,  
334 2017; Stedden et al., 2019). Once this alignment is achieved, however, the long lifetimes and  
335 unidirectional growth of their SFs likely reinforce this tissue-scale order by ensuring that each  
336 cell maintains the linear trajectory required for the entire epithelium to move in a directed way.  
337 Given that the collective migration of epithelial cells plays central roles in morphogenesis,  
338 turnover of the intestinal lining, wound repair, and the metastatic cascade (Friedl and Gilmour,  
339 2009; Jain et al., 2021; Mishra et al., 2019; Scarpa and Mayor, 2016), the use of treadmilling  
340 SFs to direct cell motility in natural contexts may be widespread.

341

342 Finally, this work highlights how SFs within a given cell type can change in both their structure  
343 and mode of assembly as a tissue develops. When follicle cell migration ends, the SFs take on  
344 a new morphogenetic role in which their contractile activity helps to create the elongated shape  
345 of the egg (Campos et al., 2020; He et al., 2010). This change in function is accompanied by a  
346 change in SF organization, in which the density of SFs across the basal surface increases,  
347 internal adhesions disappear, and large focal adhesions become concentrated at the SFs’ ends.  
348 Previous work revealed that the focal adhesions associated with the two SF types differ, with  
349  $\alpha$ PS1/ $\beta$ PS being present during migratory stages and  $\alpha$ PS2/ $\beta$ PS taking over after migration is  
350 complete; Tensin is also only present in post-migratory stages (Delon and Brown, 2009). We  
351 have now found that even the mode of F-actin assembly differs, with DAAM mediating the

352 formation of migratory SFs and Dia mediating their formation post-migration, a result that is  
353 consistent with previous studies of Dia in the follicle cells (Delon and Brown, 2009; Popkova et  
354 al., 2020). Why a different formin provides the F-actin for each type of SF is not immediately  
355 clear. However, this observation further underscores the importance of studying SFs in  
356 developing tissues where such structural transitions can and do occur.

357

358 Altogether, this work defines a new type of long-lived, treadmilling SF that appears to be ideally  
359 suited for collectively migrating epithelial cells *in vivo*. It further highlights how studying SFs in a  
360 natural context can reveal unexpected changes in the mechanisms that underly their assembly  
361 as a tissue develops.

362

## 363 **MATERIALS AND METHODS**

364

### 365 ***Drosophila* genetics**

366 We cultured *D. melanogaster* on cornmeal molasses agar food using standard techniques and  
367 performed all experiments on adult females. For most experiments, we raised crosses at 25°C  
368 and aged experimental females on yeast with males for 2-3 days at the same temperature. For  
369 tissue-wide depletion of *Abi*, which causes round eggs that block the ovary, we dissected  
370 females no more than 2 days after eclosion. Experimental genotypes for each figure panel are  
371 in Table S1.

372 We produced clones of either *DAAM*<sup>A</sup> or *DAAM*<sup>Ex68</sup> mutant cells or *DAAM*-GFP expressing cells  
373 using FRT19A with the heat shock promoter driving FLP recombinase expression. For Flp-out  
374 clones, we crossed UAS lines to flies with FLP recombinase under a heat shock promoter and  
375 an Act5c>>Gal4 Flp-out cassette with or without UAS-RFP. We induced heat shock by  
376 incubating pupae and adults at 37°C for 1 hour, followed by 1 hour of recovery at 25°C, and  
377 then another hour at 37°C. We performed this heat shock procedure approximately 6 times over  
378 the course of 3-4 days.

379 Stocks are from the Bloomington *Drosophila* Stock Center or the Vienna *Drosophila* Resource  
380 Center (see Table 1 for details) with the following exceptions: traffic jam-Gal4 (104-055), UAS-  
381 *Abi RNAi* (NIG9749R-3) and Pax-GFP (109-971) are from the *Drosophila* Genetic Resource  
382 Center in Kyoto; *DAAM*<sup>Ex68</sup>, UAS-Utr-ABD-GFP is a gift of Thomas Lecuit (Rauzi et al., 2010),  
383 UAS-C-*DAAM* (Matusek et al., 2006), *DAAM*<sup>Ex68</sup> (Dollar et al., 2016), and *DAAM*-GFP (Molnár et  
384 al., 2014) are gifts from József Mihály; UAS-Moe-ABD-mCh is a gift of Brooke McCartney, UAS-

385 Pax-GFP is a gift of Denise Montell (He et al., 2010); MRLC-mCh is a gift of Eric Wieschaus  
386 (Martin et al., 2009);  $\beta$ -Integrin/Mys-GFP is a gift from Nick Brown (Klapholz et al., 2015); Talin-  
387 GFP is gift from Hugo Bellen (Venken et al., 2011); Cy2-Gal4 is a gift from Nir Yakoby  
388 (Queenan et al., 1997).

389

### 390 **Time lapse video acquisition and microscopy**

391 We performed live imaging of egg chambers largely as described (Cetera et al., 2016), with the  
392 exact procedure outlined below. We collected experimental females 0-2 days after eclosion and  
393 aged them on yeast for 1-2 days. We dissected ovaries in live imaging media (Schneider's  
394 *Drosophila* medium containing 15% fetal bovine serum (FBS) and 200 mg/mL recombinant  
395 human insulin (Sigma)), also in some experiments containing CellMask Green (Thermo-Fisher;  
396 1:500), or Orange or Deep Red Plasma Membrane Stain (Thermo-Fisher; 1:1000). After  
397 carefully removing the muscle sheaths with forceps, we transferred individual ovarioles to fresh  
398 live imaging media to wash out excess CellMask, then transferred ovarioles and media to a  
399 glass slide, adding 51  $\mu$ m Soda Lime Glass beads (Cospheric LLC) to support a 22 x 30 mm  
400 No. 1.5 coverslip. We sealed the edges of the coverslip with Vaseline to prevent evaporation.  
401 Each slide was used for no more than 1.5 hours. We examined all egg chambers for damage  
402 prior to imaging.

403 We imaged egg chambers using a Nikon ECLIPSE-Ti inverted microscope equipped with a Ti-  
404 ND6-PFS Perfect Focus Unit. A laser merge module (Spectral Applied Research) controlled  
405 481-nm and 561-nm laser excitation from 50 mW solid-state lasers (Coherent Technology) to a  
406 motorized TIRF illuminator. We adjusted the laser illumination angle to achieve near-TIRF  
407 illumination (Tokunaga et al., 2008). We collected images using a Nikon CFI 100x Apo 1.45 NA  
408 oil immersion TIRF objective combined with 1.5x intermediate magnification onto an Andor  
409 iXon3 897 EMCCD camera. All image acquisition was controlled using MetaMorph software. We  
410 obtained time-lapse movies by capturing single planes near the basal epithelial surface every  
411 10-30 sec.

412 We used ImageJ (Schindelin et al., 2012; Schneider et al., 2012) to set minimum and maximum  
413 pixel values and in Figure 1A to perform gamma adjustment on the original 16-bit image data,  
414 before converting images to 8-bit grayscale format for display. We performed these operations  
415 identically for all images that are compared directly.

416

417

## 418 **Analyses from Live Imaging Data**

419 To calculate epithelial migration rates, we generated kymographs from the time-lapse image  
420 stacks in ImageJ (Schindelin et al., 2012; Schneider et al., 2012) by drawing a single line across  
421 several cell diameters in the direction of migration. We determined the migration rate for each  
422 epithelium by measuring the slope of 3-4 kymograph lines and averaging the values. Please see  
423 (Barlan et al., 2017) for an illustration of this technique.

424 To measure lifetime of individual SFs, we began at the midpoint of hour-long movies (imaged at  
425 10 sec or 20 sec intervals) of egg chambers expressing MRLC-mCh or -GFP. We selected one  
426 SF at a time from cells that remained in view for the entire movie, and ran the movie backwards  
427 to identify its frame of origin (if any) and forwards to identify its frame of disappearance (if any).  
428 Because egg chambers kept on slides for longer than an hour often exhibited a slowing of  
429 migration, we did not attempt to measure SF lifetime from longer movies. We expressed SF  
430 lifetime both in minutes and in cell lengths by calculating each egg chamber's migration speed  
431 as described above, and by measuring front-rear cell length at the cell's middle at the movie's  
432 midpoint.

433 To measure lifetime and behavior of individual adhesions, we imaged egg chambers expressing  
434 MRLC-mCh and Pax-GFP under the patchy driver da-Gal4 (to allow delineation of individual  
435 cells) for one hour at 10 or 20 sec intervals. As described for SFs above, we identified  
436 adhesions in the midpoint of these movies and followed them frame-by-frame, backwards and  
437 forwards, to find their time of origin and disappearance. Two mostly distinct populations of  
438 adhesions were found, one that remained in place after forming near the front or in the middle of  
439 cells ("stationary adhesions") and one that slid at the same rate as the migrating cells, invariably  
440 found near the rear ("sliding adhesions"). Their lifetime data was tabulated separately. Sliding  
441 adhesions frequently exhibited merging behavior with stationary adhesions, and this, as well as  
442 the proportion of SFs that had a sliding adhesion at a given time, was noted.

443 To produce the kymographs shown in Figure 4, we aligned images so that the anterior–posterior  
444 axis of the egg chamber coincided with the horizontal (x) image axis. For Figure 4A, we selected  
445 rectangular regions aligned with the x image axis, whose width (in x) coincided with the width of  
446 a single SF and whose height (in y) corresponded to the front-rear length of the cell. From the  
447 original image stack, we extracted an xyt substack corresponding to this rectangular region. We  
448 then applied ImageJ's Reslice tool to this stack with respect to the x-t plane, then used a  
449 maximum-intensity projection to collapse the individual slices in y to obtain a kymograph in x vs.  
450 t. For the kymograph shown in Figure 4C, we similarly selected a rectangle the width of a single

451 SF but only 25 pixels high, corresponding to the front end of the SF, and performed a summed  
452 projection rather than a maximal projection, in order to describe the total change in brightness  
453 across the width of the SF.

454 For CK-666 treatments, we dissected egg chambers expressing MRLC-mCh and endogenous  
455 Pax-GFP as described above, then separated out older ones leaving only stage 9 and younger  
456 egg chambers. We placed egg chambers into a final concentration of 1.5 mM CK-666 or the  
457 equivalent concentration of DMSO for controls, and either made the slide immediately or after  
458 incubating for a period, commencing imaging within a range of 6-70 minutes.

459

#### 460 **Fixed image acquisition and microscopy**

461 We dissected ovaries in live imaging media, as described above, removing muscle sheaths with  
462 forceps during dissection to isolate individual ovarioles. We fixed egg chambers for 15 minutes  
463 in 4% EM grade formaldehyde (Polysciences) in PBT (Phosphate buffered saline + 0.1% Triton  
464 X-100), and washed them 3x in PBT. To stain with phalloidin, we incubated them in TRITC or  
465 AlexaFluor-488 phalloidin (both 1:200, Sigma), or AlexaFluor-647 phalloidin (1:100), for 30  
466 minutes at room temperature or overnight at 4°C, then washed 3x in PBT and mounted them  
467 with one drop of SlowFade Antifade (Invitrogen) or Slowfade Diamond Antifade (Invitrogen) onto  
468 a slide with a 22 x 50mm No. 1.5 coverslip. For antibody staining (DAAM-GFP only), we fixed  
469 and washed egg chambers as above, and incubated them at 4°C overnight with an anti-GFP-  
470 Alexa488 antibody. (1:200, Invitrogen), washed them 3x over 30 minutes, and mounted them as  
471 above.

472 We imaged tissue using one of two laser-scanning confocal microscopes, either a Zeiss LSM  
473 800 with a 40x/1.3 NA EC Plan-NEOFLUAR objective or a 63x/1.4 NA Plan-APOCHROMAT  
474 objective running Zen 2.3 Blue acquisition software, or a Zeiss LSM 880 with 40x/1.3 Plan-  
475 APOCHROMAT or 63x/1.4 NA Plan-APOCHROMAT objective and a Zeiss Airyscan running  
476 Zen 2.3 Black acquisition software to improve resolution and signal-to-noise ratio. For all images  
477 a single confocal slice is shown. We did all image processing using ImageJ, as described in the  
478 video microscopy section.

479 For CK-666 treatments, we dissected egg chambers expressing MRLC-mCh and endogenous  
480 Pax-GFP as described above, then separated out older ones leaving only stage 9 and younger  
481 egg chambers. We transferred them to 500  $\mu$ L live imaging medium containing either 1.5 mM  
482 CK-666 in DMSO or the same concentration of DMSO alone and incubated covered for one  
483 hour at 25°C before fixing both as described above.

484

## 485 **Measurements from Fixed Imaging Data**

486 We measured the spacing and number of adhesions on SFs from confocal images of  
487 endogenously tagged Pax-GFP (DGRC 109-971) co-stained with AlexaFluor-647 phalloidin. We  
488 selected individual SFs (all those within a given cell that spanned at least half the cell length,  
489 and well separated from nearby SFs) using a segmented line, 4 pixels wide, in the phalloidin  
490 channel. We measured the length of this line, then used the Straighten function and the Find  
491 Peaks macro in ImageJ (using the default settings of minimum amplitude 44.8 and minimum  
492 distance 0) to count number of bright, separate paxillin spots.

493 We measured SF lateral spacing from images taken in Airyscan mode of stage 7 egg chambers  
494 stained with phalloidin, containing control and *DAAM<sup>A</sup>* mutant mitotic clones. We began by  
495 taking a line scan across the middle of the cell just inside the lateral membrane with ImageJ's  
496 Plot Profile tool, and identified individual SFs as having a gray value over 500 (16-bit data) and  
497 being at least 0.5  $\mu\text{m}$  from adjoining peaks. Line scans taken at the front and rear of the cells  
498 yielded very similar lateral spacings, indicating this does not vary across the length of the cell.  
499 We calculated lateral spacing as the number of SFs occurring across the width of the line scan.

500 To quantify mean brightness of basal structures in ImageJ, we used single confocal sections of  
501 the basal epithelial surface. For relative SF brightness, we used egg chambers mosaic for a  
502 *DAAM* loss of function mutation or Flp-out clones driving RNAi. We employed the irregular  
503 polygon tool to manually outline cells, excluding the lateral membrane and leading-edge  
504 structures, and measured mean fluorescence intensity of 10 experimental cells and 10 nearby  
505 control cells in each egg chamber, and calculated a ratio for each egg chamber. We selected  
506 cells in close proximity to avoid possible effects from anterior-posterior gradients along the egg  
507 chamber. We employed the same technique to quantify Talin-GFP brightness in egg chambers  
508 clonally expressing *DAAM* RNAi or overexpressing activated C-*DAAM*.

509 To quantify MRLC brightness, we compared egg chambers expressing *DAAM RNAi* in the entire  
510 follicular epithelium to control egg chambers, measuring the majority of the field of cells in view  
511 on the slide, but excluding regions near the edge of the egg chamber. We similarly quantified  
512 levels of *DAAM*-GFP (in egg chambers stained with antibody to GFP).

513

514

515



## 516 **Quantification and Statistical Analysis**

517 All data were obtained from at least two independent experiments, and several females were  
518 analyzed each time. All data were highly reproducible. No statistical method was used to  
519 predetermine sample size. The sample size for each experiment can be found in the figure  
520 legend. We tested data for normality using the D'Agostino & Pearson test for sample sizes  
521 above 8, and the Shapiro-Wilk test for sample sizes below 8. In nearly all cases data were  
522 normally distributed, but we chose to use non-parametric statistics as more appropriate for the  
523 low and uneven sample numbers. We used two-tailed, Wilcoxon matched-pairs signed ranks  
524 tests, or Mann-Whitney tests, to determine if two datasets were significantly different, with  
525 Dunnett's correction when comparing multiple datasets.

526  
527 Notably, non-parametric statistical tests are less powerful than the corresponding parametric  
528 versions, and thus provide a more stringent test of significance. Therefore, we also performed 2-  
529 tailed ratio paired t-tests (Figures 6D, S3C, S3D, 7F, 8B) and unpaired 2-tailed t-tests (Figure  
530 8D) or ANOVA followed by Dunnett's correction for multiple comparisons (Figure S3E), to  
531 ensure that we were not failing to reject the null hypothesis of no effect from genetic  
532 manipulations. Only in the case of C-DAAM did the parametric test detect significance not seen  
533 by the corresponding non-parametric one: both SF brightness (Figure 6D) and Talin levels  
534 (Figure 7F) had p-values < 0.05 in paired t-tests.

535  
536 Analysis was performed using Prism software, version 8 (GraphPad). Experiments were not  
537 randomized, nor was the data analysis performed blind. Egg chambers damaged by the  
538 dissection process were not included in the analysis.

539  
540

## 541 **ACKNOWLEDGEMENTS**

542 We thank Hugo Bellen, Nick Brown, Thomas Lecuit, József Mihály, Brooke McCartney, Denise  
543 Montell, Eric Wieschaus, and Nir Yakoby for generously sharing reagents. We are also grateful  
544 to Yvonne Beckham, Lindsay Llewellyn and members of the Horne-Badovinac lab for comments  
545 on the manuscript. This work was funded by a grant from the Seaver Institute to Kristin  
546 Sherrard, NIH T32 GM007183 to Maureen Cetera, and NIH R01 GM126047 to Sally Horne-  
547 Badovinac.

548

549 **COMPETING INTERESTS**

550 The authors declare no competing interests.

551

552 **AUTHOR CONTRIBUTIONS**

553 Kristin Sherrard, Conceptualization, Formal analysis, Validation, Investigation, Visualization,

554 Methodology, Writing - original draft, Writing - review and editing; Maureen Cetera,

555 Conceptualization, Methodology, Writing - review and editing; Sally Horne-Badovinac,

556 Conceptualization, Supervision, Funding acquisition, Project administration, Writing - original

557 draft, Writing - review and editing.

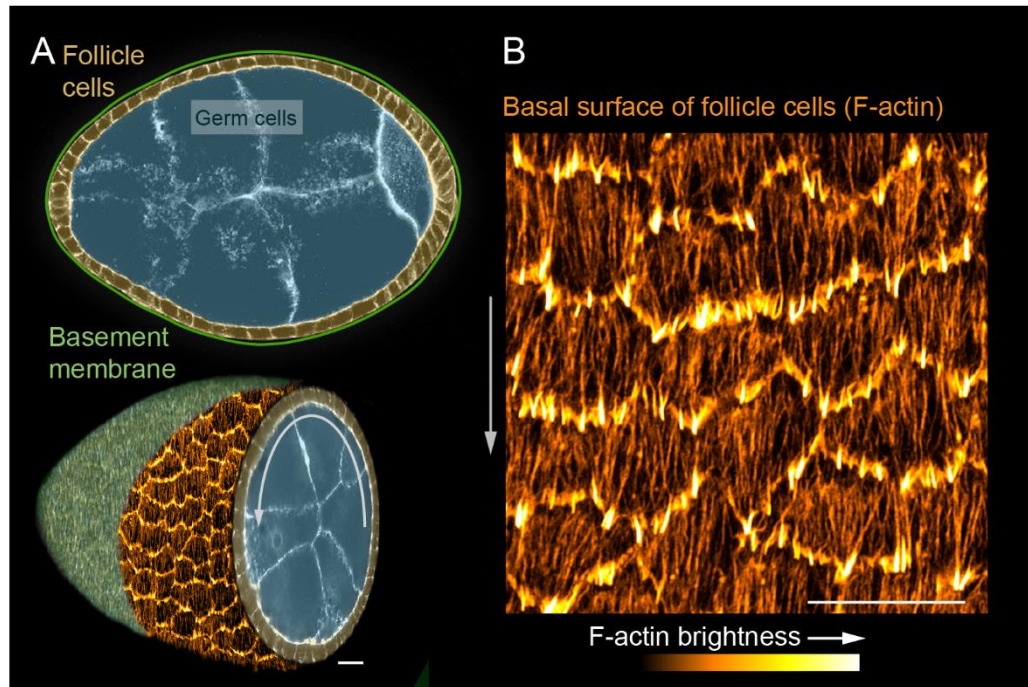

558

559

560 **Figure 1. Introduction to the SFs in collectively migrating follicle cells**

561 **(A)** Composite images of an egg chamber (pseudocolored), transverse section above and 3D  
562 cutaway view below. Curved arrow shows the rotational migration of the follicle cells as they  
563 crawl along the basement membrane ECM (drawn as a line in upper image, from a confocal  
564 section of Collagen-IV-GFP in lower image).

565 **(B)** Image of the basal surface of the follicular epithelium. Each cell has a leading-edge  
566 protrusion (yellow) and a parallel array of SFs (orange) oriented in the direction of migration.

567 Experiments performed at stage 7. Grey arrows show migration direction. Scale bars 10  $\mu\text{m}$ .

568

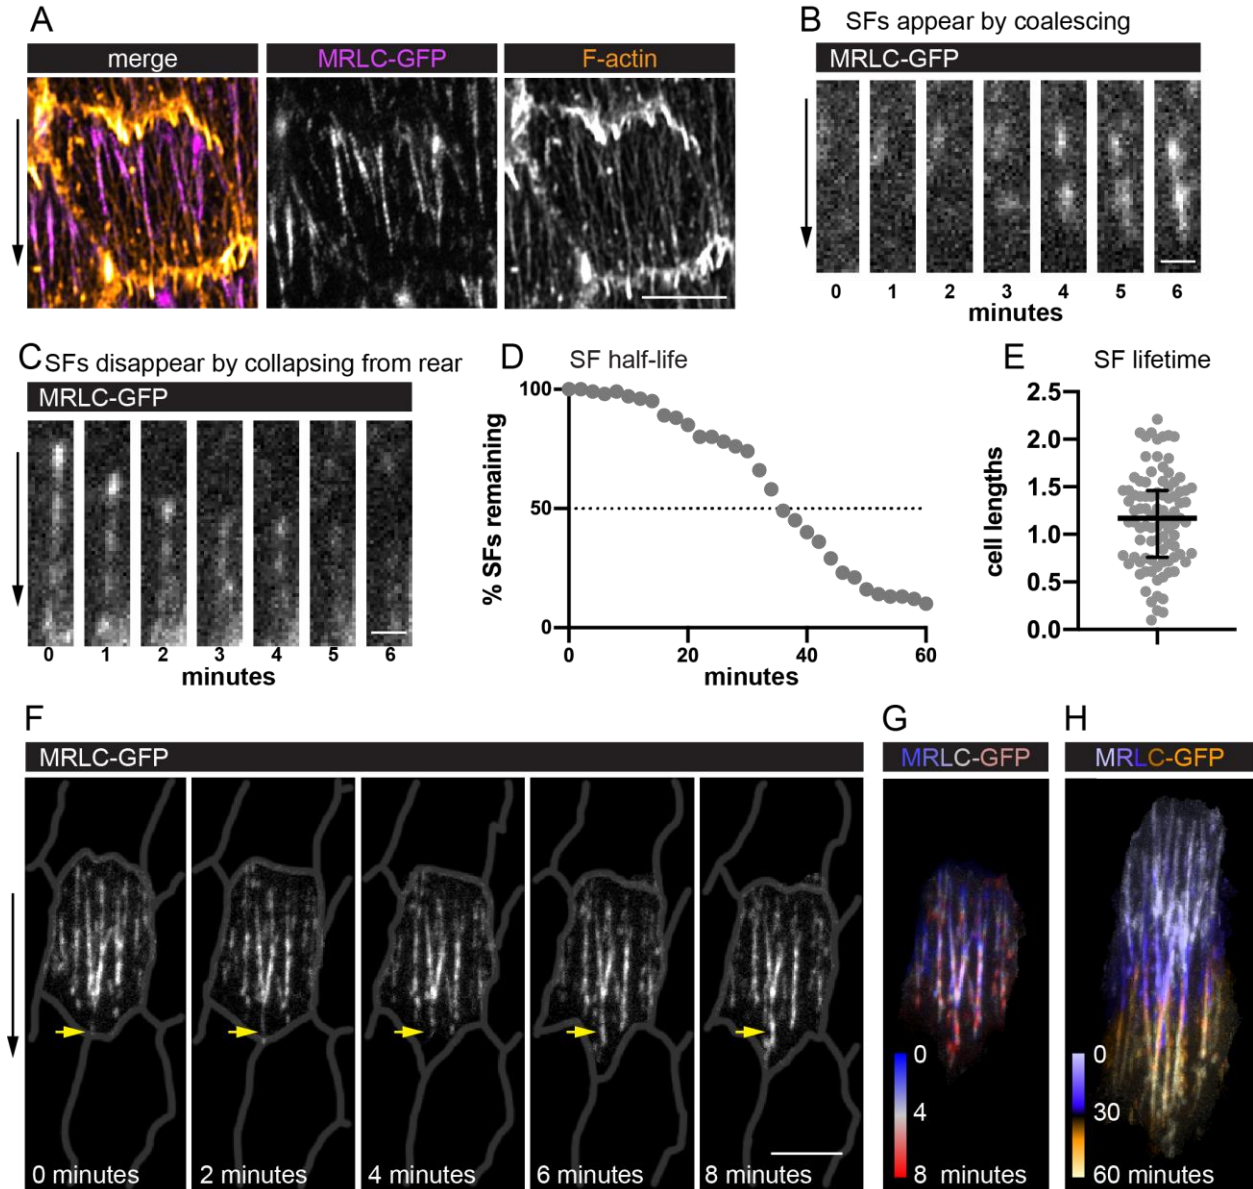

569

570

571 **Figure 2. Migrating follicle cells have long-lived, treadmilling SFs**

572 **(A)** Image of one cell showing that myosin regulatory light chain (MRLC-GFP) labels SFs, but  
 573 not leading-edge protrusions.

574 **(B, C)** Still images from movies showing a SF **(B)** forming by MRLC-GFP coalescence, and **(C)**  
 575 disappearing by collapsing from the rear.

576 **(D, E)** Quantification of SF lifetimes. **(D)** Half-life measurement in real time. **(E)** Lifetimes as a  
 577 function of how long it took the cell to migrate one cell length.  $n=91$  SFs from 23 cells in 3 egg  
 578 chambers. Bars in **(E)** show median and interquartile ranges.

579 **(F)** Still images from a movie of an optically isolated cell showing a SF tip growing as the cell  
580 migrates (arrow). Cell outlines are drawn from membrane label. See Movies S1 and S2.

581 **(G, H)** Temporal projections of SFs from the cell in (F). (G) Shows the same period as (F) at 20-  
582 second intervals. (H) Shows the period required for the cell to migrate ~1 cell length. See Movie  
583 S2.

584 Experiments performed at stage 7. Black arrows show migration direction. Scale bars 5  $\mu\text{m}$  (A,  
585 F), 1  $\mu\text{m}$  (B, C).

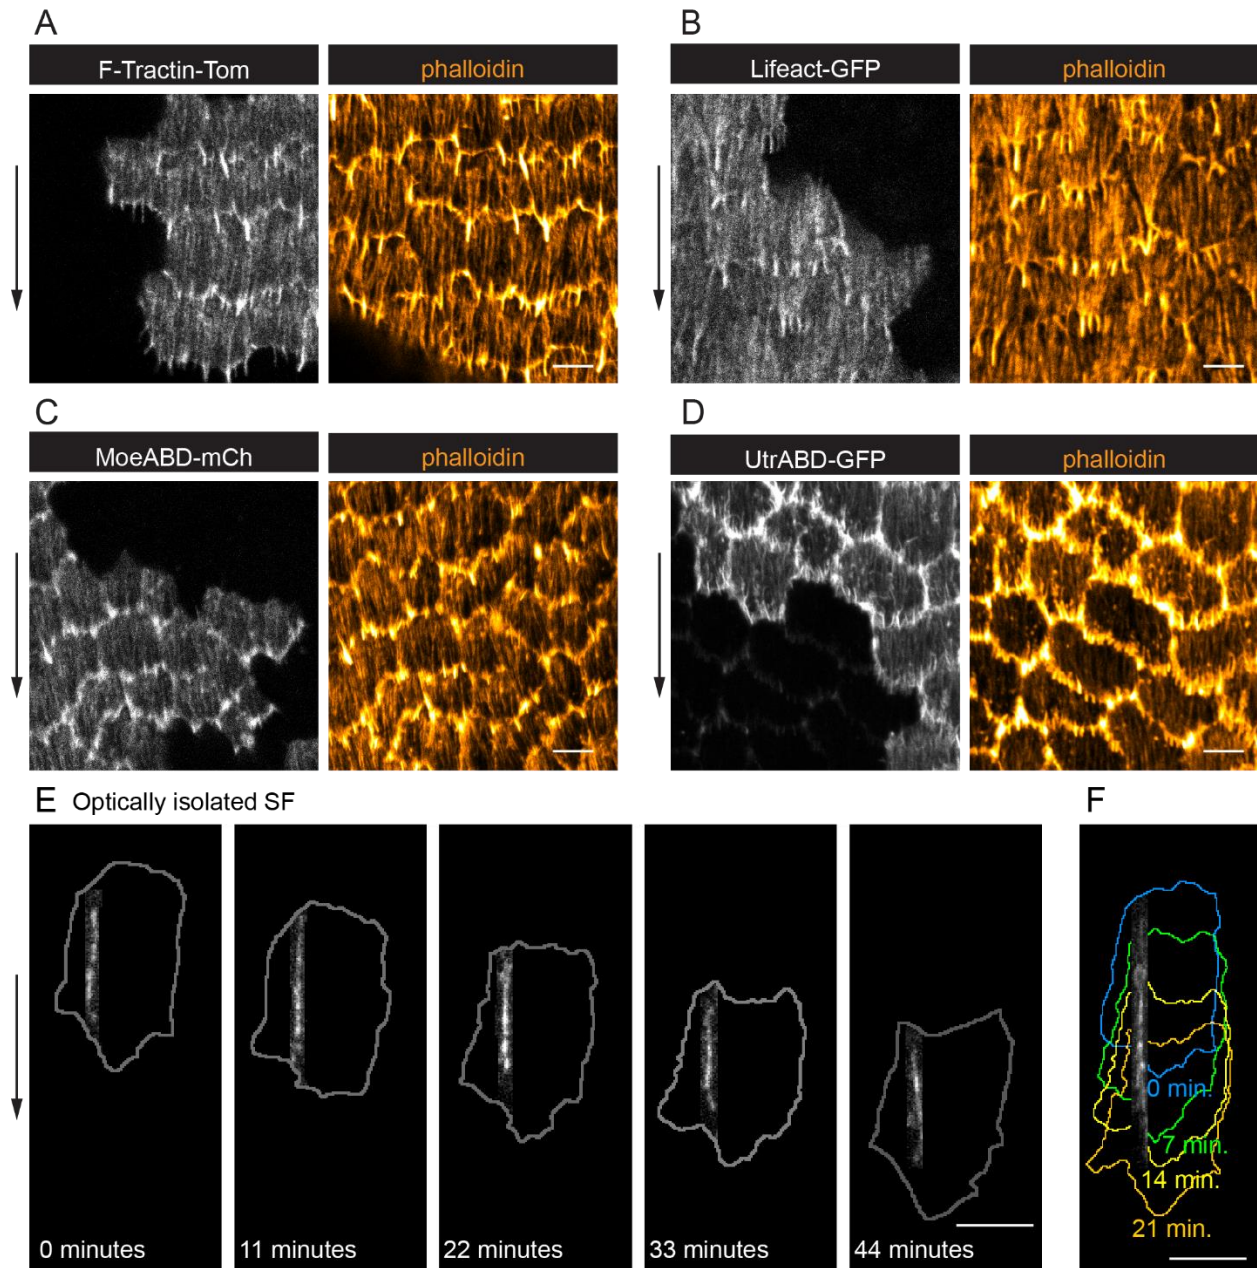

586

587

588 **Supplemental Figure 1, related to Figure 2.**

589 **(A-D)** Images of epithelia with clones of cells expressing live F-actin labels. In all cases,  
590 labelling of leading-edge protrusions obscures the ends of the SFs. LifeAct and Utr-ABD (B and  
591 D) also significantly alter F-actin organization compared to wild-type cells stained with  
592 phalloidin. In D, very weak constitutive expression of Utr is seen outside of clones.

593 **(E)** Still images from movie showing an optically isolated SF over 44 minutes; cell outlines are  
594 shown in gray.

595 **(F)** Maximal projection of the same SF as in (E), shown over 21 minutes; colored cell outlines  
596 correspond to time intervals shown.

597 Experiments performed at stages 7 and 8. Arrows show migration direction. Scale bars 5  $\mu\text{m}$ .

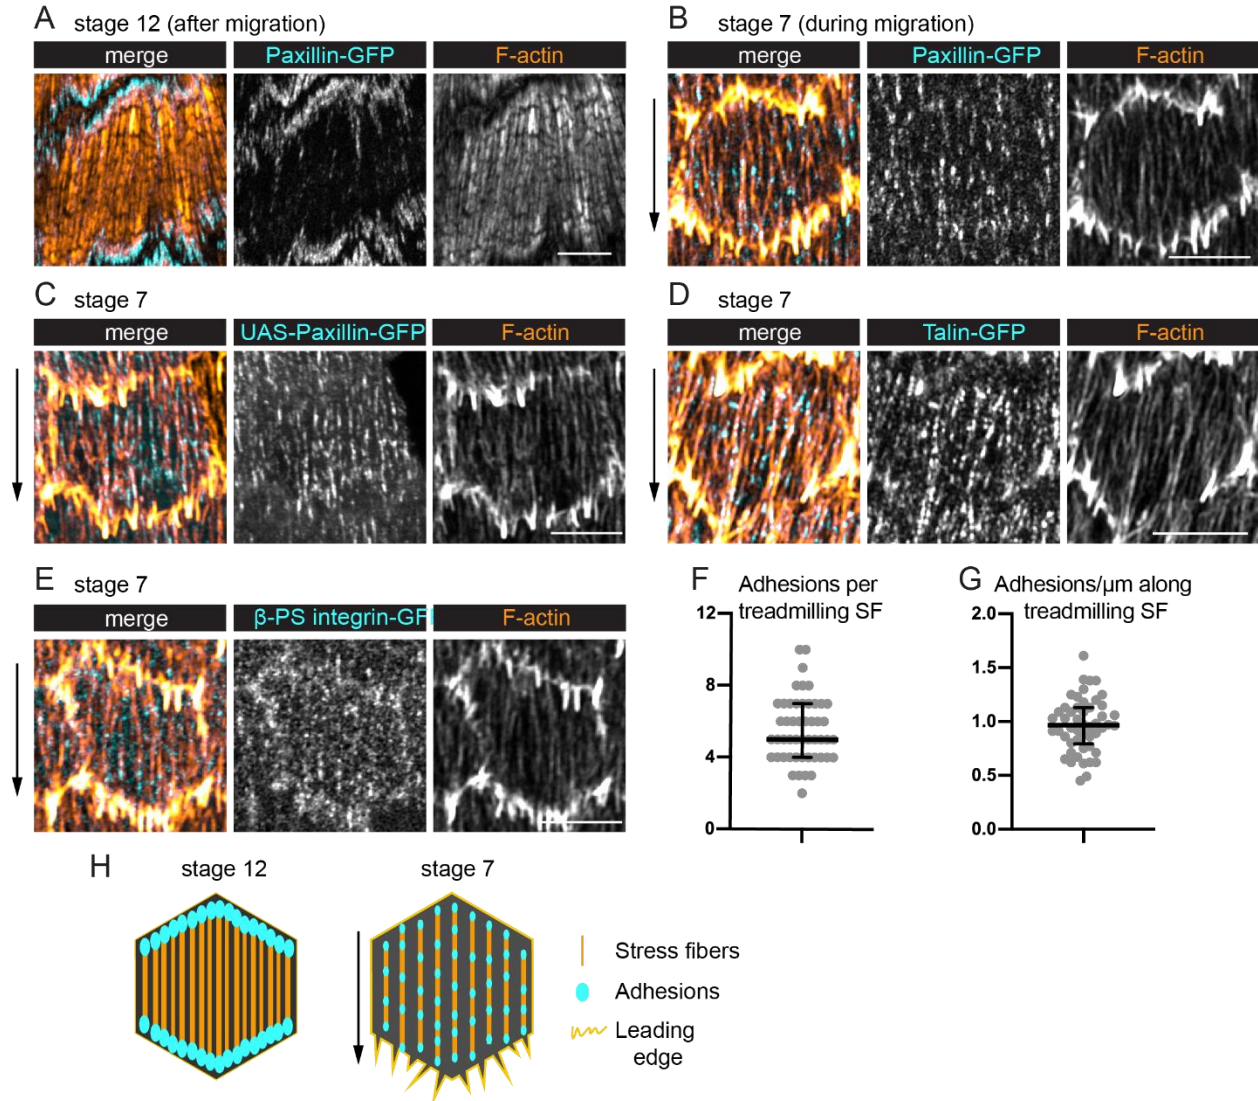

598

599

600 **Figure 3. Treadmilling SFs have many adhesions along their lengths**

601 **(A, B)** Images of SFs in single cells with adhesions labeled with Paxillin-GFP (endogenous tag).  
 602 (A) After migration stops, there are large adhesions at the ends of SFs. (B) During migration,  
 603 many smaller adhesions are found along the lengths of the SFs.

604 **(C-E)** Images of SFs in single cells showing adhesions labeled with (C) UAS-Paxillin-GFP. (D)  
 605 Talin-GFP. (E)  $\beta$ -PS integrin-GFP. Labels in (D, E) are functional endogenously tagged  
 606 proteins.

607 **(F, G)** Quantification of the adhesions associated with individual SFs using Paxillin-GFP. (F)  
 608 Number. (G) Linear density.  $n = 277$  adhesions from 11 cells in 5 egg chambers. Bars show  
 609 medians and interquartile ranges.



- 610 **(H)** Illustration of SF structure in post-migratory and migratory cells.
- 611 Black arrows show migration direction. Scale bars 5  $\mu\text{m}$ .

Method for quantifying  
number of adhesions along a SF

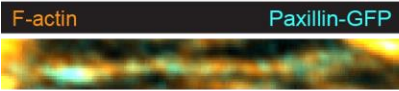

1) In F-actin channel, select SF

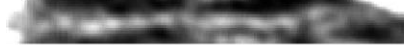

2) Draw line on center of SF

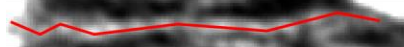

3) Apply line to Pax-GFP channel

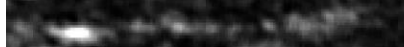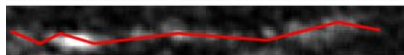

4) Apply ImageJ: Straighten  
(4 pixels wide)

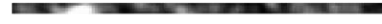

5) Apply ImageJ: Find Peaks  
(min. amp. 44.8; min. distance 0)

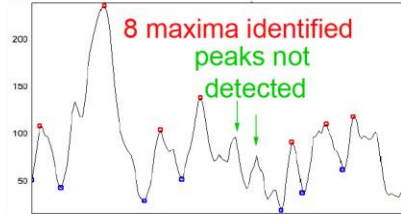

612

613

614 **Supplemental Figure 2, related to Figure 3**

615 Method of quantifying number of adhesions along a SF. For the example shown, the method  
616 identified 7 peaks (maxima), all of which correspond to easily visible adhesions. Two potential  
617 maxima did not meet the threshold for inclusion. These peaks correspond to faint possible  
618 adhesions (green arrows), which shows that this method provides a conservative estimate of  
619 the number of adhesions along a SF.

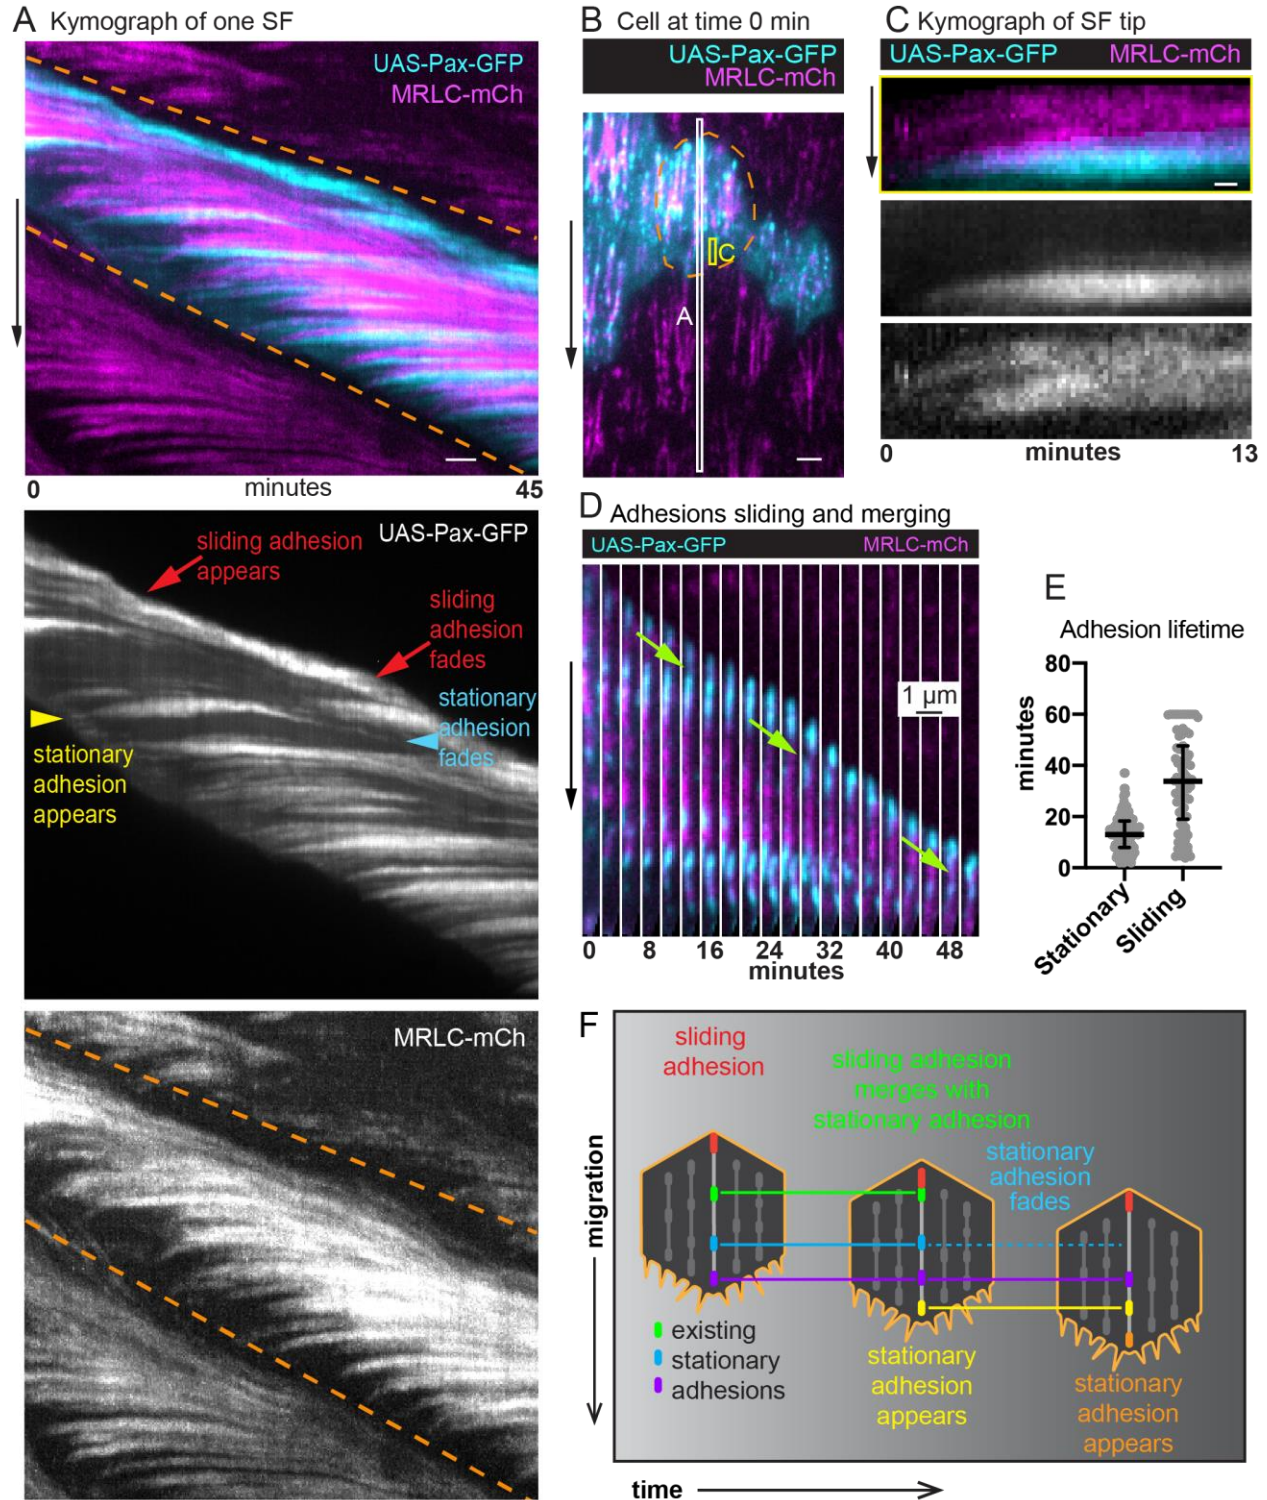

620

621

622

**Figure 4. Adhesions are continuously added and removed from treadmilling SFs**

- 623 **(A)** Kymograph of one SF (between dashed lines) from the white boxed region in (B) showing  
624 addition of new adhesions and actomyosin segments to the tip over time. Yellow arrowhead  
625 marks addition of an adhesion that remains stationary relative to cell movement and then fades  
626 as the cell's rear approaches (cyan arrowhead). Red arrows highlight the appearance and  
627 disappearance of a sliding adhesion at the rear.
- 628 **(B)** Still image from a movie of an epithelium in which all cells express MRLC-mCh and a subset  
629 of cells expresses UAS-Paxillin-GFP. Dashed line surrounds one cell. White and yellow boxes  
630 correspond to kymographs in (A) and (C), respectively. See Movie S3.
- 631 **(C)** Kymograph of a SF tip from the yellow boxed region in (B), showing that Paxillin-GFP and  
632 MRLC-mCh levels increase in synchrony as the SF grows.
- 633 **(D)** Still images from a movie showing a sliding adhesion that persists for at least 50 minutes  
634 and merges with three stationary adhesions (green arrows). See Movie S4.
- 635 **(E)** Quantification of adhesion lifetimes. In order on graph, n=134, 84 adhesions from 23 cells in  
636 3 egg chambers. Bars show medians and interquartile ranges.
- 637 **(F)** Illustration summarizing adhesion dynamics in treadmilling SFs.
- 638 Experiments performed at stage 7. Black arrows show migration direction. Scale bars 2  $\mu\text{m}$  (A,  
639 B), 0.5  $\mu\text{m}$  (C).

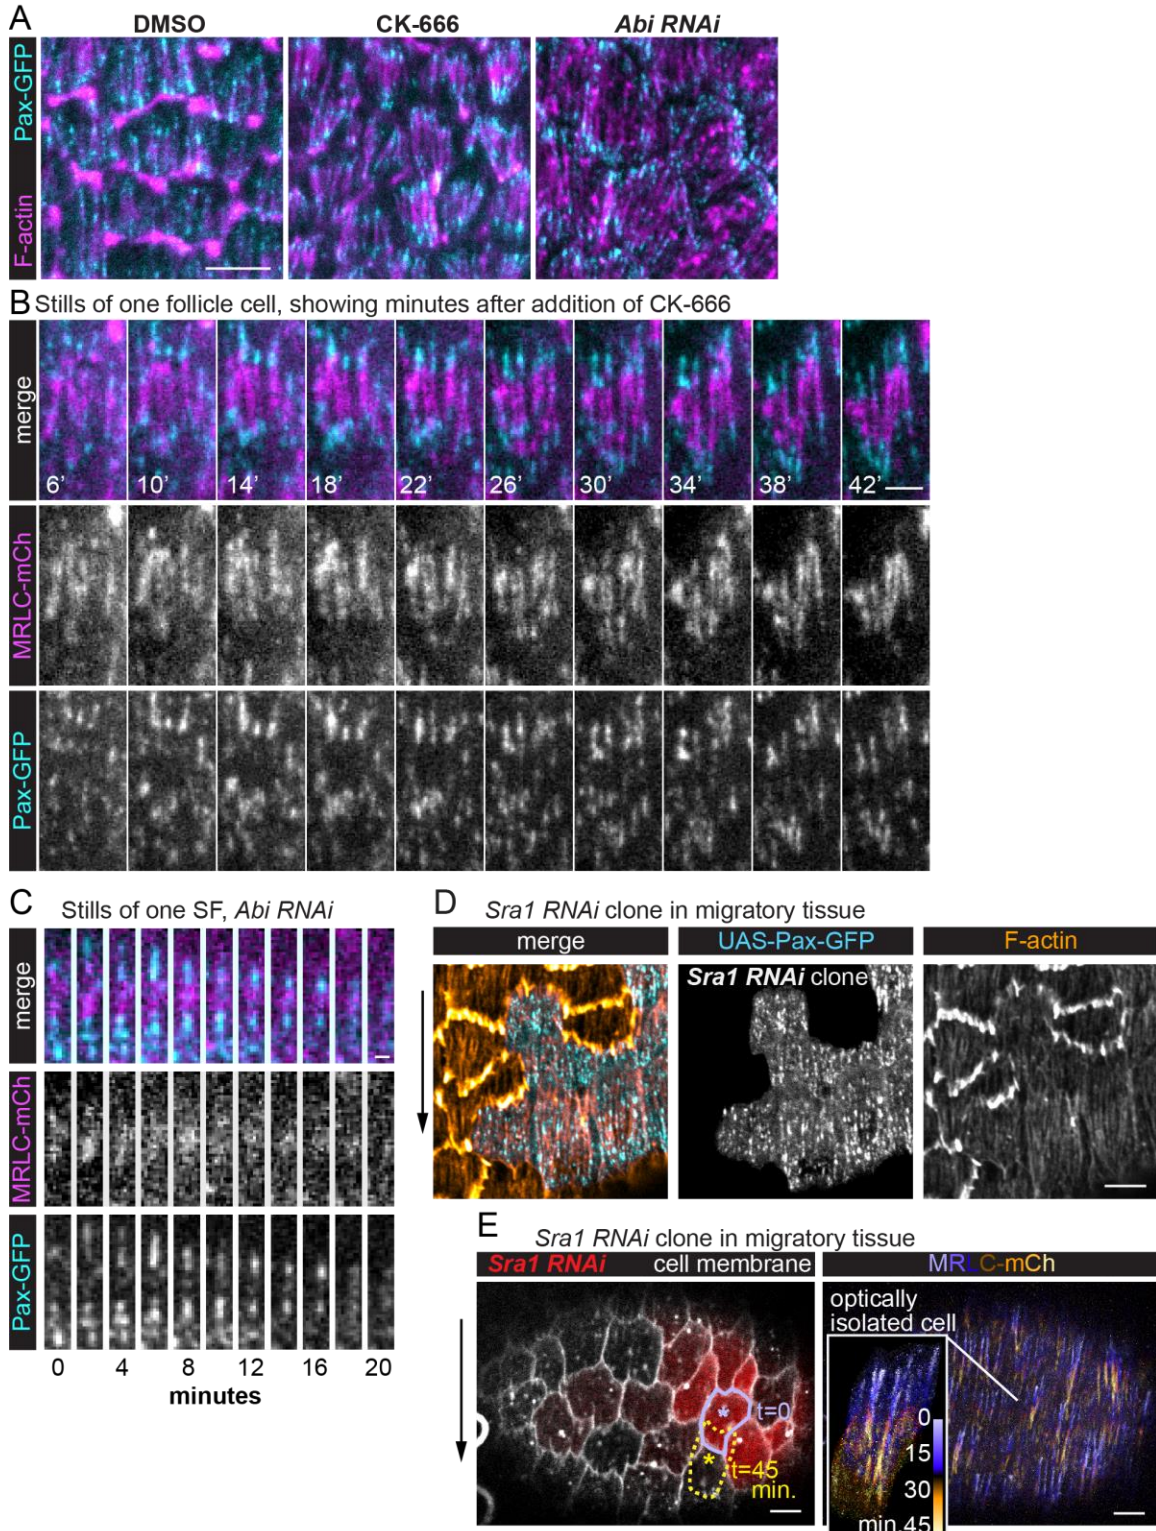

640

641

642 **Figure 5. SF treadmilling depends on cell migration**

- 643 **(A)** Images of epithelia in which migration has been blocked by eliminating leading edge  
644 protrusions. Adhesions become concentrated at the SF ends.
- 645 **(B)** Still images from a movie of one cell showing that internal adhesions disappear, and end  
646 adhesions grow as addition of CK-666 slowly brings migration to a stop. See also Movie S5.
- 647 **(C)** Still images from a movie showing one SF in an epithelium in which migration has been  
648 blocked. The SF shortens and disappears with no new adhesions added to the ends.
- 649 **(D)** Image of a migrating epithelium with a clone of cells expressing *Sra1 RNAi* to eliminate  
650 protrusions. The SFs in the clone maintain internal adhesions.
- 651 **(E)** Still image from a movie of a migrating epithelium with a clone of cells that expresses *Sra1*-  
652 RNAi to eliminate protrusions (left). Outline shows the movement of one cell over 45 minutes  
653 (lavender to yellow asterisks). Temporal projection of the SFs in the same epithelium at 20  
654 second intervals (right). Inset shows SF growth in the *Sra1 RNAi* cell marked with the asterisk  
655 on the left.
- 656 Experiments performed at stage 7. Black arrows show migration direction. Scale bars 5  $\mu\text{m}$  (A,  
657 D, E), 1  $\mu\text{m}$  (B), 2  $\mu\text{m}$  (C).

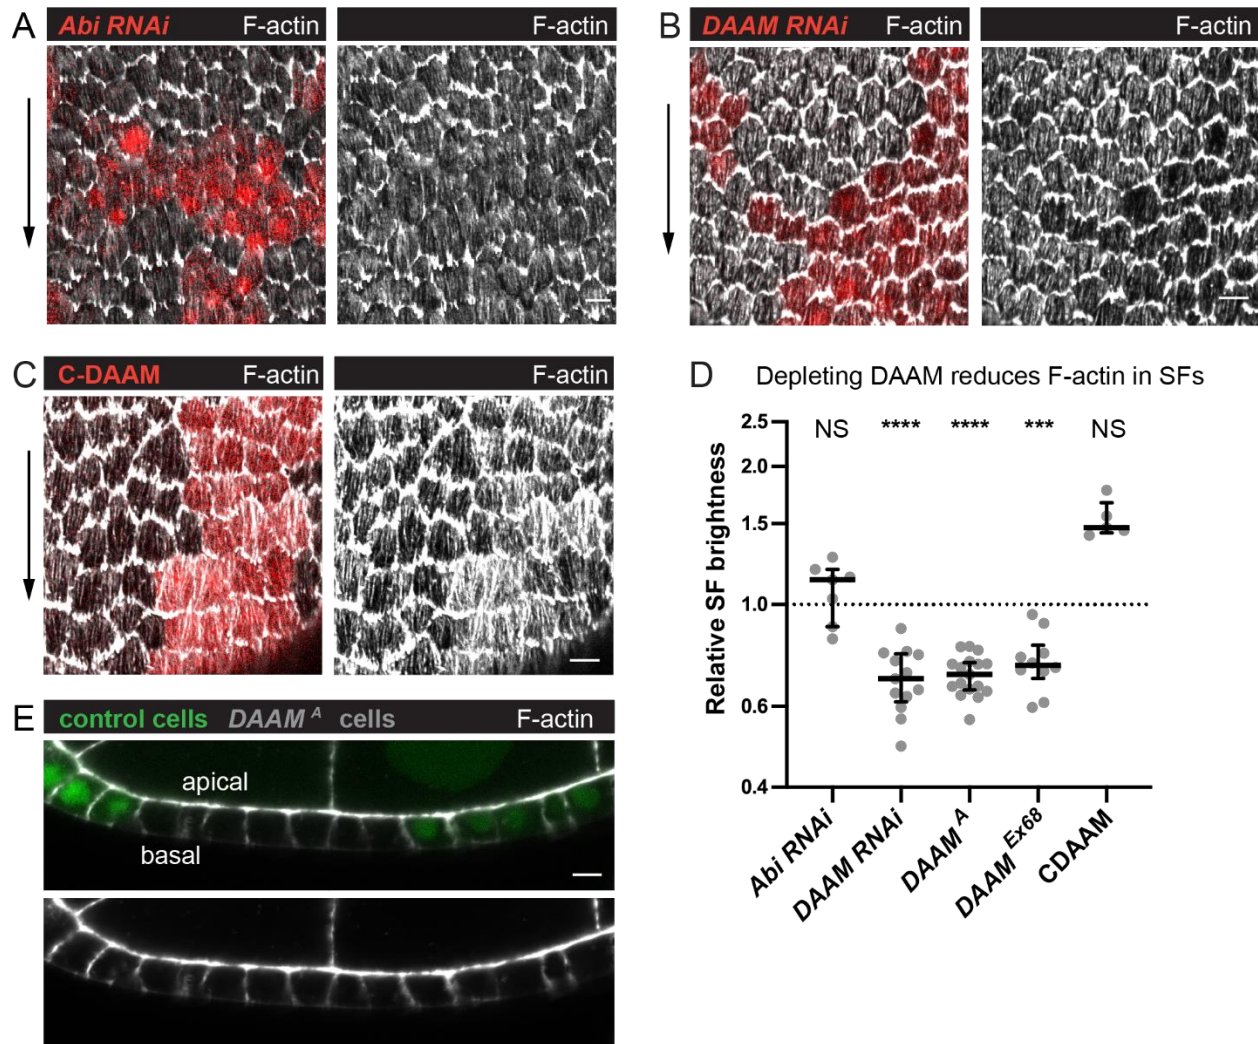

658

659

660 **Figure 6. DAAM contributes to treadmilling SF assembly**

661 **(A-C)** Images of epithelia with clones of cells expressing various transgenes. (A) *Abi RNAi*  
 662 reduces F-actin in protrusions but not SFs. (B) *DAAM RNAi* reduces SF F-actin. (C) C-*DAAM*  
 663 increases SF F-actin.

664 **(D)** Quantification of the data in (A-C). Each point is the ratio of the mean value for F-Actin  
 665 levels in SFs from 10 experimental cells and 10 nearby control cells in the same egg chamber.  
 666 In order on graph, n=7, 13, 17, 10, 5 egg chambers. Bars show medians and interquartile  
 667 ranges. Two-tailed Wilcoxon matched pairs signed ranks test. NS (not significant)  $p > 0.05$ ,  
 668 \*\*\* $p < 0.001$ , \*\*\*\* $p < 0.0001$ .

669 **(E)** Image of a transverse section through an epithelium with a clone of *DAAM<sup>A</sup>* mutant cells.  
 670 Loss of DAAM does not obviously reduce cortical F-Actin on lateral or apical surfaces.

671 Experiments performed at stage 7. Black arrows show migration direction. Scale bars 5  $\mu$ m.

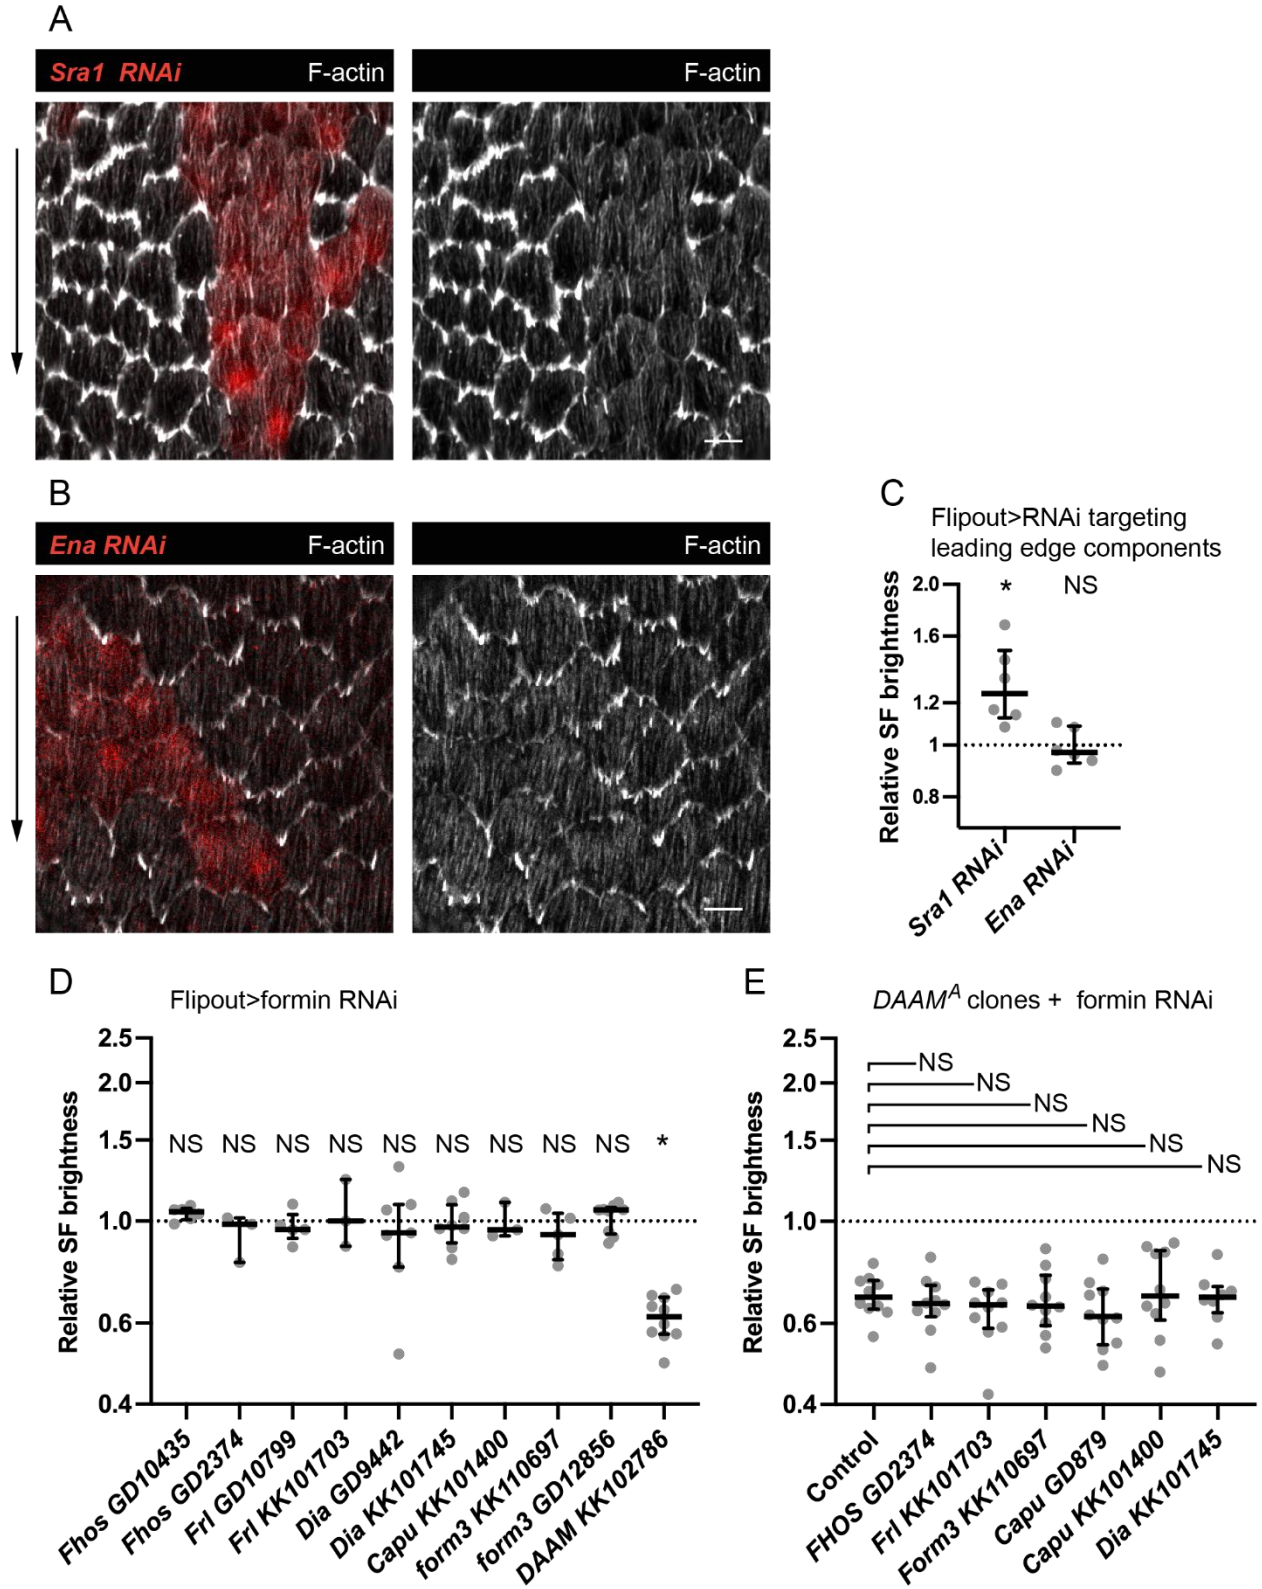

672

673

674

Supplemental Figure 3, related to Figure 6



675 **(A, B)** Images of epithelia with clones of cells expressing (A) *Sra1 RNAi* and (B) *Ena RNAi*. F-  
676 actin levels are reduced in leading edge protrusions but not in SFs.

677 **(C)** Quantification of the data in (A, B). F-actin levels in SFs are the same or higher than  
678 controls for both conditions. In order on graph, n=6, 6 egg chambers.

679 **(D)** Quantification of SF F-actin levels in clones of cells expressing RNAi against various  
680 formins. In order on graph, n=6, 3, 5, 3, 7, 8, 3, 5, 9, 10 egg chambers.

681 **(E)** Quantification of SF F-actin levels in *DAAM* mutant clones that are within epithelia that also  
682 express RNAi against various formins. In order on graph, n=10, 10, 10, 10, 10, 10, 8 egg  
683 chambers.

684 Experiments performed at stage 7. Black arrows show migration direction. Scale bars 5  $\mu$ m. (C-  
685 E) Each point is the ratio of the mean value for F-Actin levels in SFs from 10 experimental cells  
686 and 10 control cells in the same egg chamber. Bars show medians and interquartile ranges. NS  
687 (not significant)  $p>0.05$ ,  $*p<0.05$ . (C, D) Two-tailed Wilcoxon matched pairs signed ranks test.  
688 (E) Two-tailed Mann-Whitney compared to control.

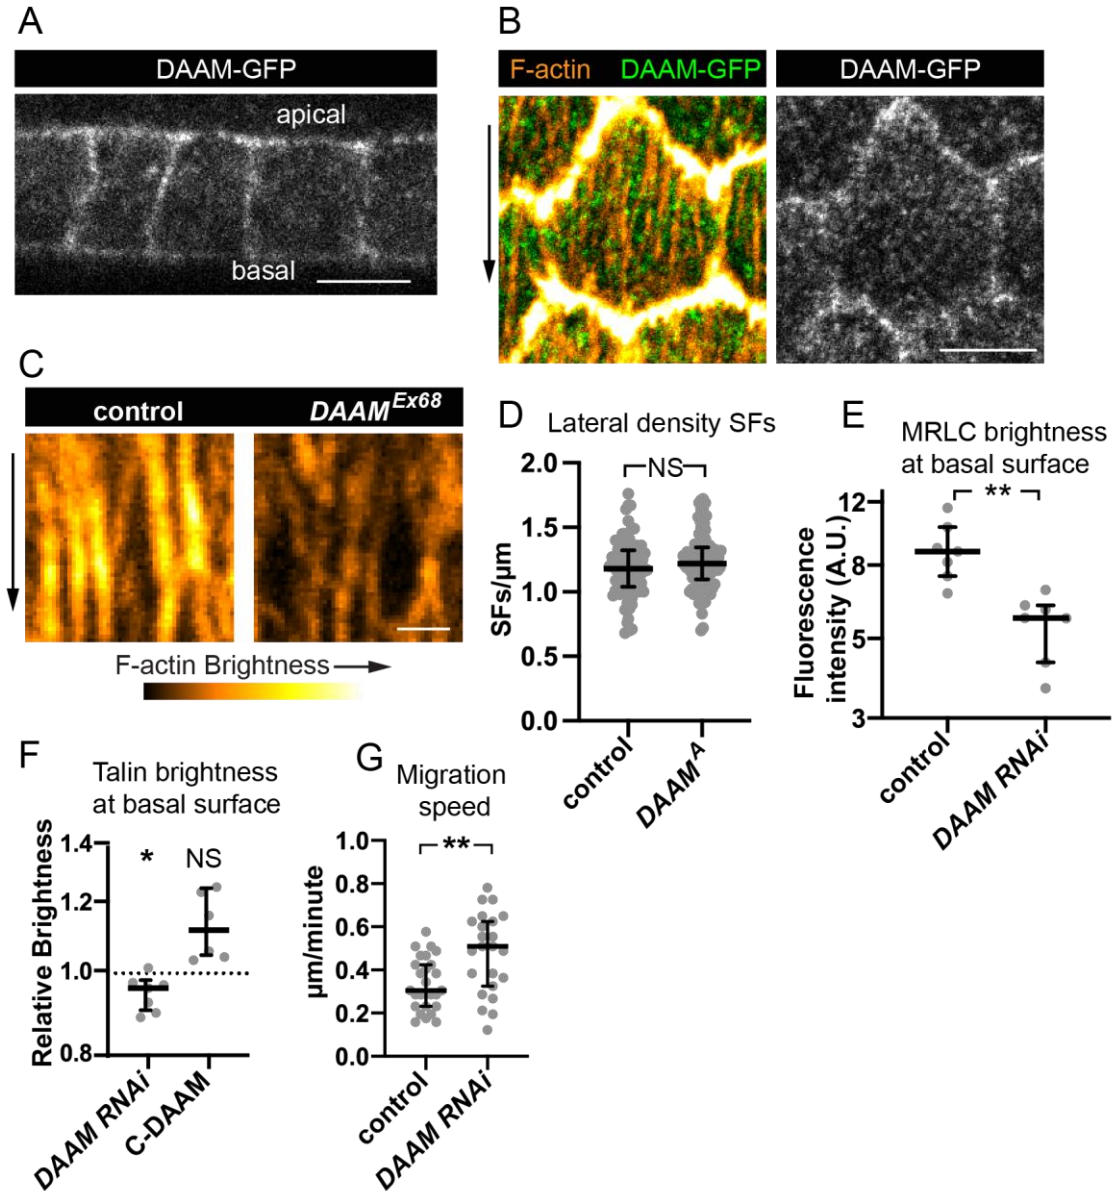

689

690

691 **Figure 7. DAAM localizes to the cortex and likely strengthens cell-ECM adhesion via SFs**

692 **(A-B)** Images of DAAM-GFP (endogenous tag). (A) Transverse section showing that DAAM  
693 localizes to the entire cell cortex. (B) Basal view of one cell showing DAAM relative to SFs.

694 **(C)** Images of SFs from a control cell and  $DAAM^{Ex86}$  cell in the same epithelium stained with  
695 phalloidin. SFs in  $DAAM^{Ex86}$  cells are similar in number but have reduced F-actin fluorescence.

696 **(D)** Quantification showing that lateral SF density is normal in  $DAAM^A$  cells. In order on graph,  
697 n=90, 90 cells from 9 egg chambers with mitotic clones.

698 **(E)** Quantification showing that MRLC levels are reduced in *DAAM RNAi* cells. In order on  
699 graph, n=7, 7 egg chambers

700 **(F)** Quantification showing that Talin levels are reduced in *DAAM RNAi* cells. Each point is the  
701 ratio of the mean value for Talin levels from 10 experimental cells and 10 control cells in the  
702 same egg chamber. In order on graph, n=7, 6 egg chambers.

703 **(G)** Quantification of migration rates for control and *DAAM RNAi* epithelia. In order on graph,  
704 n=27, 23 egg chambers.

705 Experiments performed at stage 7. Black arrows show migration direction. Scale bars, 5  $\mu\text{m}$  (A-  
706 B), 1  $\mu\text{m}$  (C). (E-H) Bars show medians and interquartile ranges. NS (not significant)  $p > 0.05$ ,  
707 \* $p < 0.05$ , \*\* $p < 0.01$ . (D, E, G) Two-tailed Mann-Whitney test. (F) Two-tailed Wilcoxon matched  
708 pairs signed ranks test.

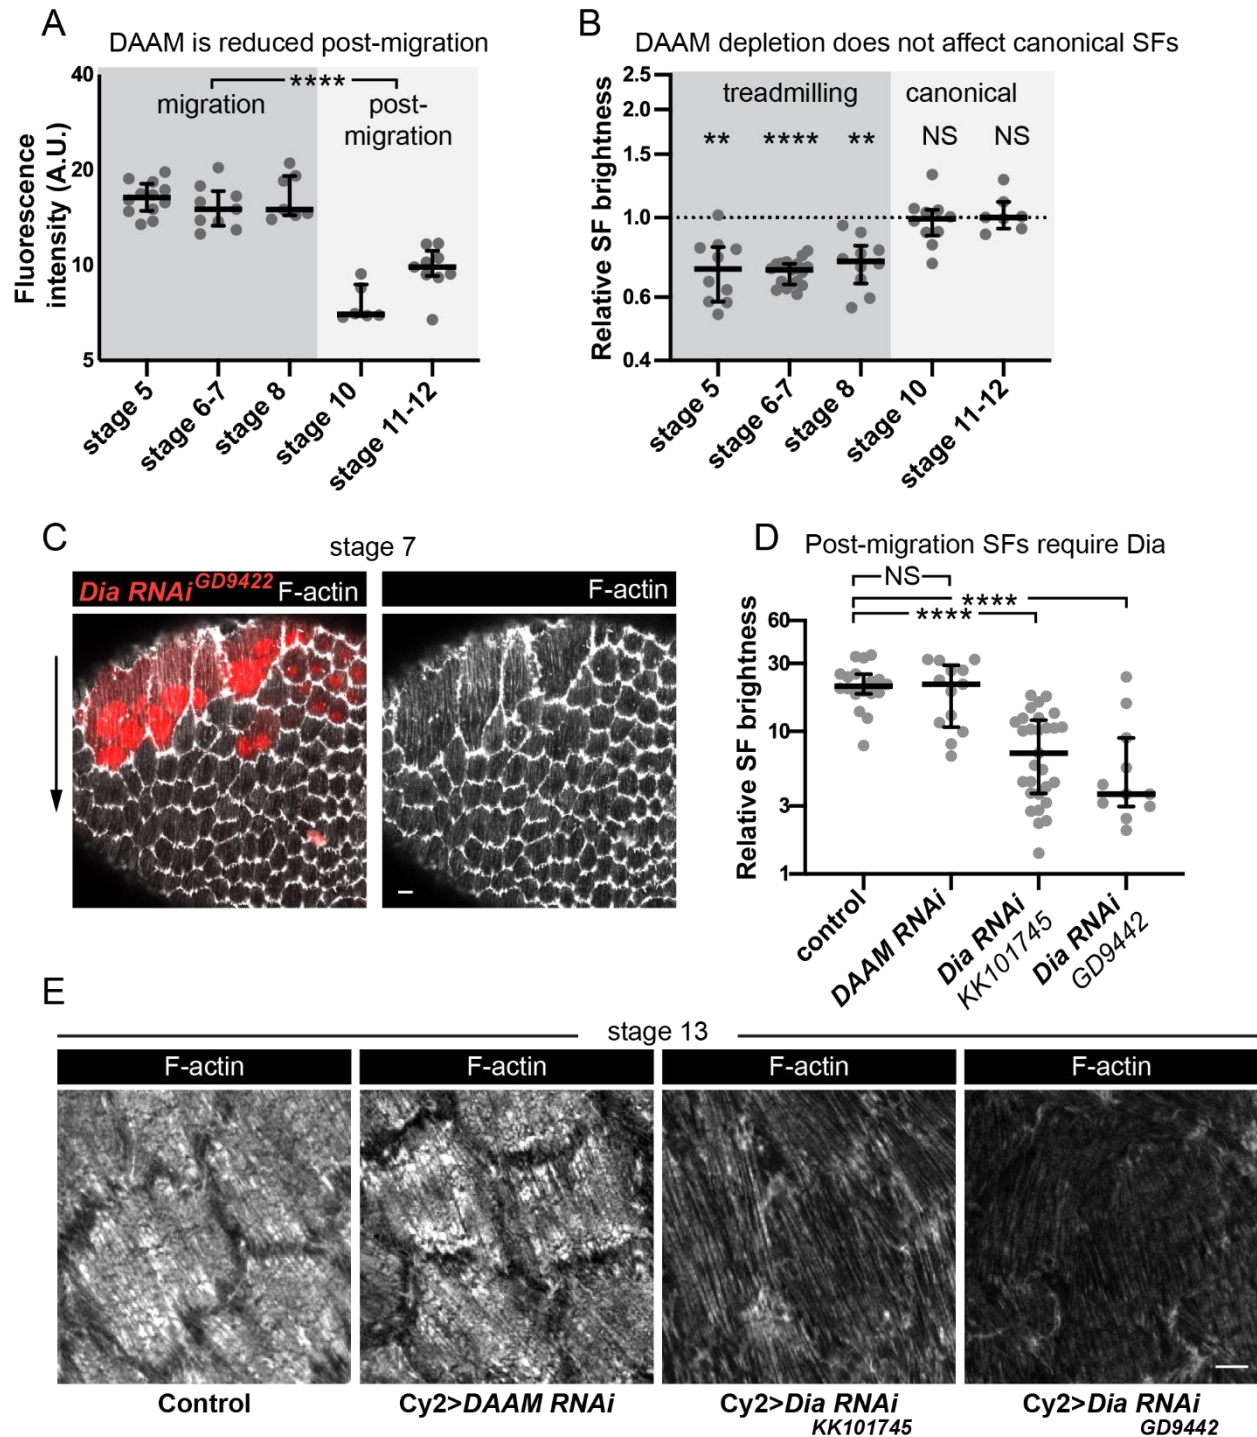

709

710

711 **Figure 8. Different formins contribute to treadmilling vs. canonical SFs**

712 **(A)** Quantification of DAAM-GFP levels at basal surface. Levels are higher during migration  
 713 stages. In order on graph, n=12, 9, 7, 6, 9 egg chambers. Statistics are on pooled data from  
 714 migration vs. post-migration stages. Two-tailed Mann-Whitney test.

715 **(B)** Quantification of F-actin levels in SFs. *DAAM RNAi* reduces F-actin in treadmilling SFs, but  
716 not canonical SFs. Each point is the ratio of the mean value for 10 RNAi cells and 10 control  
717 cells in the same egg chamber. In order on graph, n=10, 17, 10, 10, 7 egg chambers. Statistics  
718 by stage are two-tailed Wilcoxon matched pairs signed ranks tests. Pooled data from  
719 treadmilling vs. canonical SFs is from a two-tailed Mann-Whitney test.

720 **(C)** Image of an epithelium with a clone of cells expressing *Dia RNAi*. *Dia RNAi* cells have  
721 cytokinesis defects shown by multiple red nuclei per cell, but F-actin levels in SFs are normal.

722 **(D)** Quantification of F-actin levels in SFs at stage 13. When Cy2-Gal4 is used to drive RNAi  
723 during post-migration stages, *Dia RNAi* reduces F-actin in SFs, but *DAAM RNAi* does not. In  
724 order on graph, n=18, 13, 29, 11 egg chambers. Two-tailed Mann-Whitney tests.

725 **(E)** Images of cells showing that *Dia RNAi* reduces F-actin levels in SFs post-migration while  
726 *DAAM RNAi* does not (images selected from intermediate brightness values measured in D).

727 Scale bars 5  $\mu\text{m}$ . (A, B, D) Bars show medians and interquartile ranges. NS (not significant)  
728  $p>0.05$ , \*\* $p<0.01$ , \*\*\*\* $p<0.0001$

729 **Movie S1** (associated with Figure 2). Timelapse (near-TIRF) of a field of follicle cells with  
730 plasma membranes labeled with CellMask and SFs labeled with MRLC-GFP. Note that  
731 individual SFs persist as the cells migrate. Imaged at 1 frame/20 sec.

732

733 **Movie S2** (associated with Figure 2F). Timelapse (near-TIRF) of an optically isolated follicle cell  
734 with SFs labeled with MRLC-GFP. Note MRLC-GFP being added to the tips of existing SFs as  
735 the cell migrates. Imaged at 1 frame/20 sec.

736

737 **Movie S3** (associated with Figure 4B). Timelapse (near-TIRF) of a field of follicle cells. The SFs  
738 are labeled in all cells with MRLC-mCh. Adhesions are labeled in a subset of cells by da-Gal4  
739 driving patchy expression of UAS-Pax-GFP. Imaged at 1 frame/10 sec, rotated 14 degrees.

740

741 **Movie S4** (associated with Figure 4D). Timelapse (near-TIRF) of one SF in which myosin is  
742 labeled with MRLC-mCh and adhesions labeled with UAS-Pax-GFP. Note the sliding behavior  
743 of the final adhesions. Imaged at 1 frame/10 sec, rotated 14 degrees.

744

745 **Movie S5** (associated with Figure 5B). Timelapse (near-TIRF) of one follicle cell in which SFs  
746 are labeled with MRCL-mCh and adhesions labeled with endogenously tagged Pax-GFP.  
747 Treatment with the arp2/3 inhibitor CK-666 causes adhesions to become concentrated at SF  
748 ends. The time shown reflects minutes after addition of CK-666 (i.e., movie starts at 6 minutes).  
749 Imaged at 1 frame/10 sec, rotated 25 degrees.

750

751 **Table S1. Experimental genotypes**  
752

| Figure | Panel       | Genotype                                                                                                                          | °C         |
|--------|-------------|-----------------------------------------------------------------------------------------------------------------------------------|------------|
| 1      | A-B         | <i>w</i> <sup>1118</sup>                                                                                                          | 25         |
| 2      | A-C, F-I    | <i>sqh</i> <sup>Ax3/w</sup> ; <i>sqh-GFP</i>                                                                                      | 25         |
|        | D-E         | <i>sqh</i> <sup>Ax3/w</sup> ; <i>UAS-Pax-GFP/+</i> ; <i>da-Gal4/sqh-mCh</i>                                                       | 25         |
| S1     | A           | <i>w/y w hsFLP/+</i> ; <i>UAS-Ftractin-Tom/act5c&gt;&gt;Gal4</i>                                                                  | 25         |
|        | B           | <i>y w/y w hsFLP</i> ; <i>UAS-Lifeact-GFP/+</i> ; <i>act5c&gt;&gt;Gal4/+</i>                                                      | 25         |
|        | C           | <i>w/y w hsFLP</i> ; <i>UAS-Moe-ABD-mCh/ act5c&gt;&gt;Gal4</i>                                                                    | 25         |
|        | D           | <i>w/y w hsFLP</i> ; <i>UAS-Utr-ABD-GFP/+</i> ; <i>act5c&gt;&gt;Gal4/+</i>                                                        | 25         |
|        | E-F         | <i>sqh</i> <sup>Ax3/w</sup> ; <i>sqh-GFP</i>                                                                                      | 25         |
| 3      | A-B, F-H    | <i>w</i> ; <i>Pax-GFP</i>                                                                                                         | 25         |
|        | C           | <i>w/y* w*</i> ; <i>tj-Gal4/UAS-Pax-GFP</i>                                                                                       | 25         |
|        | D           | <i>w</i> ; <i>Talin-GFP</i>                                                                                                       | 25         |
|        | E           | <i>w mys-GFP</i>                                                                                                                  | 25         |
| S2     | -           | <i>w</i> ; <i>Pax-GFP</i>                                                                                                         | 25         |
| 4      | A-E         | <i>sqh</i> <sup>Ax3/w</sup> ; <i>UAS-Pax-GFP/+</i> ; <i>da-Gal4/sqh-mCh</i>                                                       | 25         |
| 5      | A left      | <i>w</i> ; <i>Pax-GFP/+</i> ; <i>sqh-mCh/+</i>                                                                                    | 25         |
|        | A middle, B | <i>w</i> ; <i>Pax-GFP/+</i> ; <i>sqh-mCh/+</i>                                                                                    | 25         |
|        | A right, C  | <i>w/y w</i> ; <i>tj-Gal4/Pax-GFP</i> ; <i>sqh-mCh/UAS-Abi RNAi<sup>NIG: 9749R-3</sup></i>                                        | 25         |
|        | D           | <i>y sc* v sev/y w hsFLP</i> ; <i>UAS-Pax-GFP/ +</i> ; <i>UAS-Sra1 RNAi<sup>TRIP.HMS01754</sup>/act5c&gt;&gt;Gal4</i>             | 25         |
|        | E           | <i>y sc* v sev/y w hsFLP</i> ; <i>act5c&gt;&gt;Gal4</i> , <i>UAS-RFP/+</i> ; <i>UAS-Sra1 RNAi<sup>TRIP.HMS01754</sup>/sqh-mCh</i> | 25         |
| 6      | A, D        | <i>w/y w hsFLP</i> ; <i>UAS-Abi RNAi<sup>NIG: 9749R-3</sup>/act5c&gt;&gt;Gal4</i> , <i>UAS-RFP</i>                                | 25         |
|        | B, D        | <i>w/y w hsFLP</i> ; <i>UAS-DAAM RNAi<sup>KK102786</sup>/+</i> ; <i>act5c&gt;&gt;Gal4</i> , <i>UAS-RFP/+</i>                      | 25         |
|        | C, D        | <i>w/y w hsFLP</i> ; <i>UAS-pTWFlag-C-DAAM/+</i> ; <i>act5c&gt;&gt;Gal4</i> , <i>UAS-RFP/+</i>                                    | 29<br>(2d) |
|        | D           | <i>hsFLP Ubi-mRFP-nls FRT19A/DAAM<sup>A</sup> FRT19A</i>                                                                          | 25         |
|        | D           | <i>hsFLP Ubi-mRFP-nls FRT19A/DAAM<sup>Ex68</sup> FRT19A</i>                                                                       | 25         |

| Figure    | Panel            | Genotype                                                                                                                                                                                                                  | °C         |
|-----------|------------------|---------------------------------------------------------------------------------------------------------------------------------------------------------------------------------------------------------------------------|------------|
|           | E                | <i>hsFLP Ubi-mRFP-nls FRT19A/DAAM<sup>A</sup> FRT19A</i>                                                                                                                                                                  | 25         |
| <b>S3</b> | A, C             | <i>y sc<sup>*</sup> v sev/y w hsFLP;; UAS-Sra1<br/>RNAi<sup>TRIP.HMS01754</sup>/act5c&gt;&gt;Gal4, UAS-RFP</i>                                                                                                            | 25         |
|           | B, C             | <i>w/y w hsFLP; UAS-Ena RNAi<sup>GD8910</sup>/+; act5c&gt;&gt;Gal4, UAS-RFP/+</i>                                                                                                                                         | 25         |
|           | D                | <i>w/y w hsFLP; UAS-RNAi /+; act5c&gt;&gt;Gal4, UAS-RFP/+<br/>or w/y w hsFLP;; UAS-RNAi/act5c&gt;&gt;Gal4, UAS-RFP<br/>(exact RNAi lines used are noted in figure)</i>                                                    | 29<br>(2d) |
|           | E                | <i>Ubi-mRFP-nls FRT19A/DAAM<sup>A</sup> FRT19A; tj-Gal4, UAS-Flp/<br/>UAS-RNAi or<br/>Ubi-mRFP-nls FRT19A/DAAM<sup>A</sup> FRT19A; tj-Gal4, UAS-Flp/+;<br/>UAS-RNAi/+<br/>(exact RNAi lines used are noted in figure)</i> | 25         |
| <b>7</b>  | A, B             | <i>DAAM-GFP/w<sup>1118</sup></i>                                                                                                                                                                                          | 25         |
|           | C                | <i>DAAM<sup>Ex68</sup> FRT19A/hsFLP Ubi-mRFP-nls FRT19A</i>                                                                                                                                                               | 25         |
|           | D                | <i>DAAM<sup>A</sup> FRT19A/hsFLP Ubi-mRFP-nls FRT19A; tj-Gal4/+</i>                                                                                                                                                       | 25         |
|           | E control        | <i>w/y w; Cyo/UAS-DAAM RNAi<sup>KK102786</sup>; sqh-mCh/+</i>                                                                                                                                                             | 25         |
|           | E experimental   | <i>w/y w; tj-Gal4/UAS-DAAM-DAAM RNAi<sup>KK102786</sup>; sqh-mCh/+</i>                                                                                                                                                    | 25         |
|           | F depletion      | <i>w/y w hsFLP; UAS-DAAM RNAi<sup>KK102786</sup>; TalinGFP/act5c&gt;&gt;Gal4,<br/>UAS-RFP</i>                                                                                                                             | 29<br>(2d) |
|           | F overexpression | <i>w/y w hsFLP; UAS-pTWFlag-C-DAAM/+;<br/>TalinGFP/act5c&gt;&gt;Gal4, UAS-RFP</i>                                                                                                                                         | 25         |
|           | G control        | <i>w/y w; tj-Gal4/+; UAS-Dcr2/+</i>                                                                                                                                                                                       | 25         |
|           | G experimental   | <i>w/y w; tj-Gal4; UAS-Dcr2/UAS-DAAM RNAi<sup>KK102786</sup></i>                                                                                                                                                          | 25         |
| <b>8</b>  | A                | <i>DAAM-GFP/w<sup>1118</sup></i>                                                                                                                                                                                          | 25         |
|           | B                | <i>DAAM<sup>A</sup> FRT19A/hsFLP Ubi-mRFP-nls FRT19A<br/>and DAAM<sup>Ex68</sup> FRT19A/hsFLP Ubi-mRFP-nls FRT19A</i>                                                                                                     | 25         |
|           | C                | <i>w/y w hsFLP; +; UAS-Dia RNAi<sup>GD9442</sup>/act5c&gt;&gt;Gal4, UAS-nls-<br/>RFP</i>                                                                                                                                  | 25         |
|           | D                | <i>(same as the four genotypes listed in 8E below)</i>                                                                                                                                                                    | 29<br>(2d) |
|           | E left           | <i>w<sup>1118</sup>; Cy2-Gal4/+</i>                                                                                                                                                                                       | 29<br>(2d) |
|           | E left middle    | <i>w<sup>1118</sup>; Cy2-Gal4/UAS-DAAM RNAi<sup>KK102786</sup></i>                                                                                                                                                        | 29<br>(2d) |



| <b>Figure</b> | <b>Panel</b>   | <b>Genotype</b>                                                      | <b>°C</b>  |
|---------------|----------------|----------------------------------------------------------------------|------------|
|               | E right middle | <i>w<sup>1118</sup>; Cy2-Gal4/+; UAS-Dia RNAi<sup>KK101745</sup></i> | 29<br>(2d) |
|               | E right        | <i>w<sup>1118</sup>; Cy2-Gal4/+; UAS-Dia RNAi<sup>GD9442</sup></i>   | 29<br>(2d) |
| <b>Movies</b> | S1, S2         | <i>sqh<sup>Ax3/w</sup>; sqh-GFP</i>                                  | 25         |
|               | S3, S4         | <i>sqh<sup>Ax3/w</sup>; UAS-Pax-GFP/+; da-Gal4/sqh-mCh</i>           | 25         |
|               | S5             | <i>w; Pax-GFP/+; sqh-mCh/+</i>                                       | 25         |

753

754

## KEY RESOURCES

| Reagent type (species) or resource | Designation                                                    | Sources or reference     | Identifiers                                               | Additional information |
|------------------------------------|----------------------------------------------------------------|--------------------------|-----------------------------------------------------------|------------------------|
| Antibody                           | rabbit polyclonal anti-GFP directly coupled to Alexa Fluor 488 | Invitrogen               | Cat # A21311                                              | 1:400                  |
| Chemical compound, drug            | CellMask™ Deep Red Plasma Membrane Stain                       | Thermo Fisher Scientific | Cat# C10046                                               | 1:1000                 |
| Chemical compound, drug            | Alexa Fluor™ 647 phalloidin                                    | Thermo Fisher Scientific | Cat# A22287                                               | 1:100                  |
| Chemical compound, drug            | Alexa Fluor™ 488 phalloidin                                    | Thermo Fisher Scientific | Cat# A12379                                               | 1:200                  |
| Chemical compound, drug            | Scheider's Drosophila medium                                   | Thermo Fisher Scientific | Cat# 21720-024                                            |                        |
| Chemical compound, drug            | Fetal Bovine Serum                                             | Gibco                    | Cat# 10438-018                                            |                        |
| Chemical compound, drug            | Recombinant Human Insulin                                      | Millipore Sigma          | Cat# 12643                                                |                        |
| Other                              | Soda Lime Glass Beads, 48-51 $\mu$ m                           | Cospheric LLC            | Cat# S-SLGMS-2.5                                          |                        |
| Chemical compound, drug            | Formaldehyde, 16%, methanol free, Ultra-Pure                   | Polysciences             | Cat# 18814-10                                             |                        |
| Chemical compound, drug            | SlowFade™ Diamond Antifade mounting medium                     | Invitrogen               | Cat# S36972                                               |                        |
| Chemical compound, drug            | SlowFade™ Antifade Kit                                         | Thermo Fisher Scientific | Cat# S2828                                                |                        |
| Chemical compound, drug            | CK-666                                                         | Millipore Sigma          | Cat# SML0006                                              |                        |
| software, algorithm                | ImageJ version 2.1.0/1.53c                                     |                          | <a href="https://fiji.sc/">https://fiji.sc/</a>           |                        |
| software, algorithm                | Handbrake 1.3.3 The open source video transcoder               | HandBrake Team           | <a href="https://handbrake.fr/">https://handbrake.fr/</a> |                        |
| software, algorithm                | Zen Blue                                                       | Zeiss                    |                                                           |                        |
| software, algorithm                | Zen Black                                                      | Zeiss                    |                                                           |                        |
| software, algorithm                | MetaMorph                                                      | Molecular Devices        |                                                           |                        |

## KEY RESOURCES

|                                                              |                                                      |                                                            |                                           |  |
|--------------------------------------------------------------|------------------------------------------------------|------------------------------------------------------------|-------------------------------------------|--|
| software, algorithm                                          | Prism Version 8                                      | Graphpad                                                   |                                           |  |
| Drosophila:<br>Standard control<br>strain: w <sup>1118</sup> | w[1118]                                              | Bloomington<br>Drosophila Stock<br>Center                  | BDSC: 3605;<br>FlyBase ID:<br>FBst0003605 |  |
| Drosophila:<br>sqh-GFP                                       | Sqh-2xTY1- SGFP-<br>3xFLAG                           | Vienna<br>Drosophila<br>Resource Center                    | VDRRC: 318484                             |  |
| Drosophila:<br>MRLC-mCh                                      | sqhAx3/FM7;; sqh>sqh-<br>mCh/TM3, Ser, actGFP        | Laboratory of Eric<br>Wieschaus<br>(Martin et al.<br>2009) |                                           |  |
| Drosophila:<br>UAS-Pax-GFP                                   | UAS-Pax-GFP                                          | Laboratory of<br>Denise Montell<br>(He et al. 2010)        |                                           |  |
| Drosophila:<br>daughterless Gal4                             | w*; P{GAL4-da.G32}UH1,<br>Sb1/TM6B, Tb1              | Bloomington<br>Drosophila Stock<br>Center                  | BDSC: 31418;<br>FlyBaseID:<br>FBst0055851 |  |
| Drosophila:<br>hsFLP                                         | P{ry[+t7.2] = hsFLP}22,<br>w[*]}                     | Bloomington<br>Drosophila Stock<br>Center                  | BDSC: 8862;<br>FlyBase ID:<br>FBst0008862 |  |
| Drosophila:<br>act5c>>Gal4                                   | y1 w*; P{GAL4-<br>Act5C(FRT.CD2).P}S                 | Bloomington<br>Drosophila Stock<br>Center                  | BDSC: 4780;<br>FlyBase ID:<br>FBst0004780 |  |
| Drosophila:<br>UAS-Ftractin-Tom                              | P{UASp-F-<br>Tractin.tdTomato}15A/SM<br>6b; MKRS/TM2 | Bloomington<br>Drosophila Stock<br>Center                  | BDSC: 58989;<br>FlyBaseID:<br>FBtp0095457 |  |
| Drosophila:<br>UAS-Lifeact-GFP                               | y w; UAS-Lifeact-GFP                                 | Bloomington<br>Drosophila Stock<br>Center                  | BDSC: 35544;<br>FlyBaseID:<br>FBst0035544 |  |
| Drosophila:<br>UAS-<br>MoesinABD—mCh<br>42c                  | UASMoesinABD—mCh<br>42c                              | Laboratory of<br>Brooke<br>McCartney                       |                                           |  |
| Drosophila:<br>UAS-Utr-ABD-GFP                               | UAS-Utrophin-ABD-GFP                                 | Laboratory of<br>Thomas Lecuit<br>(Rauzi et al.<br>2010)   |                                           |  |
| Drosophila:<br>Pax-GFP                                       | w[1118]; PBac{EGFP-<br>IV}Pax[KM0601]                | Kyoto Stock<br>Center                                      | DGRC: 109971                              |  |

## KEY RESOURCES

|                                        |                                                                                                   |                                                      |                                         |  |
|----------------------------------------|---------------------------------------------------------------------------------------------------|------------------------------------------------------|-----------------------------------------|--|
| Drosophila:<br>Talin-GFP               | y w; rhea-eGFP-Flash-Strep-FLAG/TM6b                                                              | Laboratory of Hugo Bellen (Venken et al. 2011)       |                                         |  |
| Drosophila:<br>Mys-GFP                 | Mys-GFP                                                                                           | Laboratory of Nicholas Brown (Klapholtz et al. 2015) |                                         |  |
| Drosophila:<br>traffic jam-Gal4        | y* w*;<br>P{w+mW.hs=GawB}NP16 24 / CyO, P{w- =UASlacZ.UW14}UW14                                   | Kyoto Stock Center                                   | DGRC: 104055                            |  |
| Drosophila:<br>RNAi of Abi             | UAS-Abi RNAi                                                                                      | National Institute of Genetics, Japan                | NIG: 9749R-3                            |  |
| Drosophila:<br>RNAi of Sra1            | y1 sc* v1 sev21;<br>P{TRiP.HMS01754}attP2                                                         | Bloomington Drosophila Stock Center                  | BDSC: 38294;<br>FlyBaseID: FBst0038294  |  |
| Drosophila:<br>act5c>>Gal4,<br>UAS-RFP | D. melanogaster. w[1118];<br>P{w[+mC]=GAL4-Act5C(FRT.CD2).P}S,<br>P{w[+mC]=UAS-RFP.W}3/TM3, Sb[1] | Bloomington Drosophila Stock Center                  | BDSC: 30558;<br>FlyBase ID: FBst0030558 |  |
| Drosophila:<br>UAS-C-DAAM              | UAS-pTWFlag-C-DAAM                                                                                | Laboratory of József. Mihály (Matusek et al. 2006)   |                                         |  |
| Drosophila:<br>hsFLP RFP FRT 19A       | Ubi-mRFP.nls, w*, hsFLP neoFRT19A                                                                 | Bloomington Drosophila Stock Center                  | BDSC: 31418;<br>FlyBaseID: FBst0031418  |  |
| Drosophila:<br>DAAMA FRT 19A           | y1 DAAMA w*<br>P{neoFRT}19A/FM7c,<br>P{GAL4-Kr.C}DC1,<br>P{UAS-GFP.S65T}DC5,<br>sn+               | Bloomington Drosophila Stock Center                  | BDSC: 52348;<br>FlyBaseID: FBst0052348  |  |
| Drosophila:<br>DAAMEx68                | DAAMEx68                                                                                          | Laboratory of József. Mihály (Dollár et al. 2016)    |                                         |  |
| Drosophila:<br>19A FRT                 | P{ry[+t7.2]=neoFRT}19A;<br>ry[506]                                                                | Bloomington Drosophila Stock Center                  | BDSC: 1709;<br>FlyBaseID: FBst0001709   |  |

## KEY RESOURCES

|                                         |                                                                 |                                           |                                                               |  |
|-----------------------------------------|-----------------------------------------------------------------|-------------------------------------------|---------------------------------------------------------------|--|
| Drosophila:<br>DAAMEx68 FRT<br>19A      | DAAMEx68 FRT 19A                                                | Recombination<br>only,<br>this study      | DAAMEx68 from J.<br>Mihály;<br>and 19A FRT from<br>BDSC: 1709 |  |
| Drosophila:<br>RFP FRT 19A              | P{w[+mC]=Ubi-<br>mRFP.nls}1, w[1118],<br>P{ry[+t7.2]=neoFRT}19A | Bloomington<br>Drosophila Stock<br>Center | BDSC: 31416;<br>FlyBase ID:<br>FBst0031416                    |  |
| Drosophila:<br>RNAi of DAAM             | w[1118];<br>P{KK102786}v103921                                  | Vienna<br>Drosophila<br>Resource Center   | VDRC: 103921                                                  |  |
| Drosophila:<br>RNAi of Dia              | w[1118];<br>P{KK101745}v103914                                  | Vienna<br>Drosophila<br>Resource Center   | VDRC: 103914                                                  |  |
| Drosophila:<br>RNAi of Dia              | w[1118];<br>P{GD9442}v20518                                     | Vienna<br>Drosophila<br>Resource Center   | VDRC: 20518                                                   |  |
| Drosophila:<br>RNAi of<br>FHOS/Knittrig | w[1118]; +;<br>P{GD10435}v145838                                | Vienna<br>Drosophila<br>Resource Center   | VDRC: 45838 (line<br>has been<br>discontinued)                |  |
| Drosophila:<br>RNAi of<br>FHOS/Knittrig | w[1118];<br>P{GD2374}v34034                                     | Vienna<br>Drosophila<br>Resource Center   | VDRC:<br>34034                                                |  |
| Drosophila:<br>RNAi of Frl              | w[1118]; +;<br>P{GD10799}v34413                                 | Vienna<br>Drosophila<br>Resource Center   | VDRC: 34413                                                   |  |
| Drosophila:<br>RNAi of Frl              | w[1118];<br>P{KK101703}v110438                                  | Vienna<br>Drosophila<br>Resource Center   | VDRC: 110438                                                  |  |
| Drosophila:<br>RNAi of Capu             | w[1118];<br>P{KK101400}v110404                                  | Vienna<br>Drosophila<br>Resource Center   | VDRC: 110404                                                  |  |
| Drosophila:<br>RNAi of Capu             | w[1118];<br>P{GD879}v34278                                      | Vienna<br>Drosophila<br>Resource Center   | VDRC: 34278                                                   |  |
| Drosophila:<br>RNAi of Form3            | w[1118]; P{GD12856}v<br>45594                                   | Vienna<br>Drosophila<br>Resource Center   | VDRC: 45594                                                   |  |
| Drosophila:<br>RNAi of Form3            | w[1118];<br>P{KK110697}v107473                                  | Vienna<br>Drosophila<br>Resource Center   | VDRC:<br>107473                                               |  |

## KEY RESOURCES

|                            |                                       |                                                            |                                            |  |
|----------------------------|---------------------------------------|------------------------------------------------------------|--------------------------------------------|--|
| Drosophila:<br>RNAi of Ena | w[1118];<br>P{GD8910}v43058           | Vienna<br>Drosophila<br>Resource Center                    | VDRC: 43058                                |  |
| Drosophila:<br>DAAM-GFP    | w[1118 ] DAAM-GFP                     | Laboratory of<br>József. Mihály<br>(Molnár et al.<br>2014) |                                            |  |
| Drosophila:<br>UAS-Dcr     | w[1118]; P{w[+mC] =<br>UAS-Dcr-2.D}10 | Bloomington<br>Drosophila Stock<br>Center                  | BDSC: 24651;<br>FlyBase ID:<br>FBst0024651 |  |
| Drosophila:<br>Cy2 Gal4    | w[1118]; Cy-Gal4                      | Laboratory of Nir<br>Yakoby (Queenan<br>et al.1997)        | FBti0007266                                |  |

755

## 756 REFERENCES

- 757 Ballestrem, C., Hinz, B., Imhof, B.A., Wehrle-Haller, B., 2001. Marching at the front and  
758 dragging behind: differential  $\alpha$  $\beta$ 3-integrin turnover regulates focal adhesion  
759 behavior. *J. Cell Biol.* 155, 1319–1332. <https://doi.org/10.1083/jcb.200107107>
- 760 Barlan, K., Cetera, M., Horne-Badovinac, S., 2017. Fat2 and Lar Define a Basally Localized  
761 Planar Signaling System Controlling Collective Cell Migration. *Dev. Cell* 40, 467-477.e5.  
762 <https://doi.org/10.1016/j.devcel.2017.02.003>
- 763 Burridge, K., Guilluy, C., 2016. Focal adhesions, stress fibers and mechanical tension. *Exp. Cell*  
764 *Res.* 343, 14–20. <https://doi.org/10.1016/j.yexcr.2015.10.029>
- 765 Burridge, K., Wittchen, E.S., 2013. The tension mounts: Stress fibers as force-generating  
766 mechanotransducers. *J Cell Biol* 200, 9–19. <https://doi.org/10.1083/jcb.201210090>
- 767 Campos, F.C., Dennis, C., Alégot, H., Fritsch, C., Isabella, A., Pouchin, P., Bardot, O., Horne-  
768 Badovinac, S., Mirouse, V., 2020. Oriented basement membrane fibrils provide a  
769 memory for F-actin planar polarization via the Dystrophin-Dystroglycan complex during  
770 tissue elongation. *Development* 147. <https://doi.org/10.1242/dev.186957>
- 771 Cetera, M., Horne-Badovinac, S., 2015. Round and round gets you somewhere: collective cell  
772 migration and planar polarity in elongating *Drosophila* egg chambers. *Curr. Opin. Genet.*  
773 *Dev.* 32, 10–15. <https://doi.org/10.1016/j.gde.2015.01.003>
- 774 Cetera, M., Lewellyn, L., Horne-Badovinac, S., 2016. Cultivation and Live Imaging of *Drosophila*  
775 Ovaries, in: Dahmann, C. (Ed.), *Drosophila, Methods in Molecular Biology*. Springer New  
776 York, New York, NY, pp. 215–226. [https://doi.org/10.1007/978-1-4939-6371-3\\_12](https://doi.org/10.1007/978-1-4939-6371-3_12)
- 777 Cetera, M., Ramirez-San Juan, G.R., Oakes, P.W., Lewellyn, L., Fairchild, M.J., Tanentzapf, G.,  
778 Gardel, M.L., Horne-Badovinac, S., 2014. Epithelial rotation promotes the global  
779 alignment of contractile actin bundles during *Drosophila* egg chamber elongation. *Nat.*  
780 *Commun.* 5, 5511. <https://doi.org/10.1038/ncomms6511>
- 781 Chugh, P., Paluch, E.K., 2018. The actin cortex at a glance. *J. Cell Sci.* 131, jcs186254.  
782 <https://doi.org/10.1242/jcs.186254>
- 783 Costa, K.D., Hucker, W.J., Yin, F.C.-P., 2002. Buckling of actin stress fibers: A new wrinkle in  
784 the cytoskeletal tapestry. *Cell Motil.* 52, 266–274. <https://doi.org/10.1002/cm.10056>
- 785 Courtemanche, N., 2018. Mechanisms of formin-mediated actin assembly and dynamics.  
786 *Biophys. Rev.* 10, 1553–1569. <https://doi.org/10.1007/s12551-018-0468-6>
- 787 Delon, I., Brown, N.H., 2009. The integrin adhesion complex changes its composition and  
788 function during morphogenesis of an epithelium. *J. Cell Sci.* 122, 4363–4374.  
789 <https://doi.org/10.1242/jcs.055996>
- 790 Digman, M.A., Brown, C.M., Horwitz, A.R., Mantulin, W.W., Gratton, E., 2008. Paxillin Dynamics  
791 Measured during Adhesion Assembly and Disassembly by Correlation Spectroscopy.  
792 *Biophys. J.* 94, 2819–2831. <https://doi.org/10.1529/biophysj.107.104984>
- 793 Dollar, G., Gombos, R., Barnett, A.A., Sanchez Hernandez, D., Maung, S.M.T., Mihály, J.,  
794 Jenny, A., 2016. Unique and Overlapping Functions of Formins Frl and DAAM During  
795 Ommatidial Rotation and Neuronal Development in *Drosophila*. *Genetics* 202, 1135–  
796 1151. <https://doi.org/10.1534/genetics.115.181438>
- 797 Friedl, P., Gilmour, D., 2009. Collective cell migration in morphogenesis, regeneration and  
798 cancer. *Nat. Rev. Mol. Cell Biol.* 10, 445–457. <https://doi.org/10.1038/nrm2720>

- 799 Gutzeit, H.O., 1991. Organization and in vitro activity of microfilament bundles associated with  
800 the basement membrane of *Drosophila* follicles. *Acta Histochem. Suppl.* 41, 201–210.
- 801 Gutzeit, H.O., 1990. The microfilament pattern in the somatic follicle cells of mid-vitellogenic  
802 ovarian follicles of *Drosophila*. *Eur. J. Cell Biol.* 53, 349–356.
- 803 Haigo, S.L., Bilder, D., 2011. Global tissue revolutions in a morphogenetic movement controlling  
804 elongation. *Science* 331, 1071–1074. <https://doi.org/10.1126/science.1199424>
- 805 He, L., Wang, X., Tang, H.L., Montell, D.J., 2010. Tissue elongation requires oscillating  
806 contractions of a basal actomyosin network. *Nat. Cell Biol.* 12, 1133–1142.  
807 <https://doi.org/10.1038/ncb2124>
- 808 Horne-Badovinac, S., Bilder, D., 2005. Mass transit: Epithelial morphogenesis in the *Drosophila*  
809 egg chamber. *Dev. Dyn.* 232, 559–574. <https://doi.org/10.1002/dvdy.20286>
- 810 Hotulainen, P., Lappalainen, P., 2006. Stress fibers are generated by two distinct actin  
811 assembly mechanisms in motile cells. *J. Cell Biol.* 173, 383–394.  
812 <https://doi.org/10.1083/jcb.200511093>
- 813 Isabella, A.J., Horne-Badovinac, S., 2016. Rab10-mediated secretion synergizes with tissue  
814 movement to build a polarized basement membrane architecture for organ  
815 morphogenesis. *Dev. Cell* 38, 47–60. <https://doi.org/10.1016/j.devcel.2016.06.009>
- 816 Jain, S., Ladoux, B., Mège, R.-M., 2021. Mechanical plasticity in collective cell migration. *Curr.*  
817 *Opin. Cell Biol.* 72, 54–62. <https://doi.org/10.1016/j.ceb.2021.04.006>
- 818 Kassianidou, E., Kumar, S., 2015. A biomechanical perspective on stress fiber structure and  
819 function. *Biochim. Biophys. Acta* 1853, 3065–3074.  
820 <https://doi.org/10.1016/j.bbamcr.2015.04.006>
- 821 Katoh, K., Kano, Y., Masuda, M., Onishi, H., Fujiwara, K., 1998. Isolation and Contraction of the  
822 Stress Fiber. *Mol. Biol. Cell* 9, 1919–1938.
- 823 Klapholz, B., Herbert, S.L., Wellmann, J., Johnson, R., Parsons, M., Brown, N.H., 2015.  
824 Alternative Mechanisms for Talin to Mediate Integrin Function. *Curr. Biol.* 25, 847–857.  
825 <https://doi.org/10.1016/j.cub.2015.01.043>
- 826 Kühn, S., Geyer, M., 2014. Formins as effector proteins of Rho GTPases. *Small GTPases* 5,  
827 e983876. <https://doi.org/10.4161/sgtp.29513>
- 828 Laukaitis, C.M., Webb, D.J., Donais, K., Horwitz, A.F., 2001. Differential Dynamics of  $\alpha 5$   
829 Integrin, Paxillin, and  $\alpha$ -Actinin during Formation and Disassembly of Adhesions in  
830 Migrating Cells. *J. Cell Biol.* 153, 1427–1440. <https://doi.org/10.1083/jcb.153.7.1427>
- 831 Lehtimäki, J., Hakala, M., Lappalainen, P., 2017. Actin Filament Structures in Migrating Cells, in:  
832 Jockusch, B.M. (Ed.), *The Actin Cytoskeleton, Handbook of Experimental*  
833 *Pharmacology*. Springer International Publishing, Cham, pp. 123–152.  
834 [https://doi.org/10.1007/164\\_2016\\_28](https://doi.org/10.1007/164_2016_28)
- 835 Lehtimäki, J.I., Rajakylä, E.K., Tojkander, S., Lappalainen, P., 2021. Generation of stress fibers  
836 through myosin-driven re-organization of the actin cortex. *eLife* 10, e60710.  
837 <https://doi.org/10.7554/eLife.60710>
- 838 Lewellyn, L., Cetera, M., Horne-Badovinac, S., 2013. Misshapen decreases integrin levels to  
839 promote epithelial motility and planar polarity in *Drosophila*. *J. Cell Biol.* 200, 721–729.  
840 <https://doi.org/10.1083/jcb.201209129>



- 841 Livne, A., Geiger, B., 2016. The inner workings of stress fibers - from contractile machinery to  
842 focal adhesions and back. *J. Cell Sci.* 129, 1293–1304.  
843 <https://doi.org/10.1242/jcs.180927>
- 844 Lu, J., Doyle, A.D., Shinsato, Y., Wang, S., Bodendorfer, M.A., Zheng, M., Yamada, K.M., 2020.  
845 Basement Membrane Regulates Fibronectin Organization Using Sliding Focal  
846 Adhesions Driven by a Contractile Winch. *Dev. Cell.*  
847 <https://doi.org/10.1016/j.devcel.2020.01.007>
- 848 Martin, A.C., Kaschube, M., Wieschaus, E.F., 2009. Pulsed contractions of an actin-myosin  
849 network drive apical constriction. *Nature* 457, 495–499.  
850 <https://doi.org/10.1038/nature07522>
- 851 Matussek, T., Djiane, A., Jankovics, F., Brunner, D., Mlodzik, M., Mihály, J., 2006. The  
852 *Drosophila* formin DAAM regulates the tracheal cuticle pattern through organizing the  
853 actin cytoskeleton. *Dev. Camb. Engl.* 133, 957–966. <https://doi.org/10.1242/dev.02266>
- 854 Mishra, A.K., Campanale, J.P., Mondo, J.A., Montell, D.J., 2019. Cell interactions in collective  
855 cell migration. *Development* 146. <https://doi.org/10.1242/dev.172056>
- 856 Molnár, I., Migh, E., Szikora, S., Kalmár, T., Végh, A.G., Deák, F., Barkó, S., Bugyi, B., Orfanos,  
857 Z., Kovács, J., Juhász, G., Váró, G., Nyitrai, M., Sparrow, J., Mihály, J., 2014. DAAM is  
858 required for thin filament formation and Sarcomerogenesis during muscle development  
859 in *Drosophila*. *PLoS Genet.* 10, e1004166. <https://doi.org/10.1371/journal.pgen.1004166>
- 860 Naumanen, P., Lappalainen, P., Hotulainen, P., 2008. Mechanisms of actin stress fibre  
861 assembly. *J. Microsc.* 231, 446–454. <https://doi.org/10.1111/j.1365-2818.2008.02057.x>
- 862 Oakes, P.W., Beckham, Y., Stricker, J., Gardel, M.L., 2012. Tension is required but not  
863 sufficient for focal adhesion maturation without a stress fiber template. *J. Cell Biol.* 196,  
864 363–374. <https://doi.org/10.1083/jcb.201107042>
- 865 Popkova, A., Stone, O.J., Chen, L., Qin, X., Liu, C., Liu, J., Belguise, K., Montell, D.J., Hahn,  
866 K.M., Rauzi, M., Wang, X., 2020. A Cdc42-mediated supracellular network drives  
867 polarized forces and *Drosophila* egg chamber extension. *Nat. Commun.* 11, 1–15.  
868 <https://doi.org/10.1038/s41467-020-15593-2>
- 869 Queenan, A.M., Ghabrial, A., Schüpbach, T., 1997. Ectopic activation of torpedo/Egfr, a  
870 *Drosophila* receptor tyrosine kinase, dorsalizes both the eggshell and the embryo. *Dev.*  
871 *Camb. Engl.* 124, 3871–3880.
- 872 Rauzi, M., Lenne, P.-F., Lecuit, T., 2010. Planar polarized actomyosin contractile flows control  
873 epithelial junction remodelling. *Nature* 468, 1110–1114.  
874 <https://doi.org/10.1038/nature09566>
- 875 Rid, R., Schiefermeier, N., Grigoriev, I., Small, J.V., Kaverina, I., 2005. The last but not the  
876 least: The origin and significance of trailing adhesions in fibroblastic cells. *Cell Motil.* 61,  
877 161–171. <https://doi.org/10.1002/cm.20076>
- 878 Ridley, A.J., 2011. Life at the Leading Edge. *Cell* 145, 1012–1022.  
879 <https://doi.org/10.1016/j.cell.2011.06.010>
- 880 Scarpa, E., Mayor, R., 2016. Collective cell migration in development. *J. Cell Biol.* 212, 143–  
881 155. <https://doi.org/10.1083/jcb.201508047>
- 882 Schindelin, J., Arganda-Carreras, I., Frise, E., Kaynig, V., Longair, M., Pietzsch, T., Preibisch,  
883 S., Rueden, C., Saalfeld, S., Schmid, B., Tinevez, J.-Y., White, D.J., Hartenstein, V.,  
884 Eliceiri, K., Tomancak, P., Cardona, A., 2012. Fiji - an Open Source platform for

- 885 biological image analysis. *Nat. Methods* 9, 10.1038/nmeth.2019.  
886 <https://doi.org/10.1038/nmeth.2019>
- 887 Schneider, C.A., Rasband, W.S., Eliceiri, K.W., 2012. NIH Image to ImageJ: 25 years of Image  
888 Analysis. *Nat. Methods* 9, 671–675.
- 889 Schönichen, A., Geyer, M., 2010. Fifteen formins for an actin filament: A molecular view on the  
890 regulation of human formins. *Biochim. Biophys. Acta BBA - Mol. Cell Res.*, Includes  
891 Special Section on Formins 1803, 152–163.  
892 <https://doi.org/10.1016/j.bbamcr.2010.01.014>
- 893 Schwartz, M.A., 2010. Integrins and extracellular matrix in mechanotransduction. *Cold Spring  
894 Harb. Perspect. Biol.* 2, a005066. <https://doi.org/10.1101/cshperspect.a005066>
- 895 Smilenov, L.B., Mikhailov, A., Pelham, R.J., Marcantonio, E.E., Gundersen, G.G., 1999. Focal  
896 Adhesion Motility Revealed in Stationary Fibroblasts. *Science* 286, 1172–1174.  
897 <https://doi.org/10.1126/science.286.5442.1172>
- 898 Stedden, C.G., Menegas, W., Zajac, A.L., Williams, A.M., Cheng, S., Özkan, E., Horne-  
899 Badovinac, S., 2019. Planar-Polarized Semaphorin-5c and Plexin A Promote the  
900 Collective Migration of Epithelial Cells in *Drosophila*. *Curr. Biol.* 29, 908-920.e6.  
901 <https://doi.org/10.1016/j.cub.2019.01.049>
- 902 Svitkina, T.M., 2020. Actin Cell Cortex: Structure and Molecular Organization. *Trends Cell Biol.*  
903 30, 556–565. <https://doi.org/10.1016/j.tcb.2020.03.005>
- 904 Tojkander, S., Gateva, G., Husain, A., Krishnan, R., Lappalainen, P., 2015. Generation of  
905 contractile actomyosin bundles depends on mechanosensitive actin filament assembly  
906 and disassembly. *eLife* 4. <https://doi.org/10.7554/eLife.06126>
- 907 Tojkander, S., Gateva, G., Lappalainen, P., 2012. Actin stress fibers - assembly, dynamics and  
908 biological roles. *J. Cell Sci.* 125, 1855–1864. <https://doi.org/10.1242/jcs.098087>
- 909 Tojkander, S., Gateva, G., Schevzov, G., Hotulainen, P., Naumanen, P., Martin, C., Gunning,  
910 P.W., Lappalainen, P., 2011. A Molecular Pathway for Myosin II Recruitment to Stress  
911 Fibers. *Curr. Biol.* 21, 539–550. <https://doi.org/10.1016/j.cub.2011.03.007>
- 912 Tokunaga, M., Imamoto, N., Sakata-Sogawa, K., 2008. Highly inclined thin illumination enables  
913 clear single-molecule imaging in cells. *Nat. Methods* 5, 159–161.  
914 <https://doi.org/10.1038/nmeth1171>
- 915 Valencia, D.A., Quinlan, M.E., 2021. Formins. *Curr. Biol.* 31, R517–R522.  
916 <https://doi.org/10.1016/j.cub.2021.02.047>
- 917 Vallenius, T., 2013. Actin stress fibre subtypes in mesenchymal-migrating cells. *Open Biol.* 3,  
918 130001. <https://doi.org/10.1098/rsob.130001>
- 919 Venken, K.J.T., Schulze, K.L., Haelterman, N.A., Pan, H., He, Y., Evans-Holm, M., Carlson,  
920 J.W., Levis, R.W., Spradling, A.C., Hoskins, R.A., Bellen, H.J., 2011. MiMIC: a highly  
921 versatile transposon insertion resource for engineering *Drosophila melanogaster* genes.  
922 *Nat. Methods* 8, 737–743. <https://doi.org/10.1038/nmeth.1662>
- 923 Vignaud, T., Copos, C., Leterrier, C., Tseng, Q., Blanchoin, L., Mogilner, A., Théry, M.,  
924 Kurzawa, L., 2020. Stress fibers are embedded in a contractile cortical network  
925 (preprint). *Cell Biology*. <https://doi.org/10.1101/2020.02.11.944579>
- 926 Walma, D.A.C., Yamada, K.M., 2020. The extracellular matrix in development. *Development*  
927 147. <https://doi.org/10.1242/dev.175596>

- 928 Wehrle-Haller, B., Imhof, B.A., 2003. Actin, microtubules and focal adhesion dynamics during  
929 cell migration. *Int. J. Biochem. Cell Biol.* 35, 39–50. [https://doi.org/10.1016/S1357-](https://doi.org/10.1016/S1357-2725(02)00071-7)  
930 [2725\(02\)00071-7](https://doi.org/10.1016/S1357-2725(02)00071-7)
- 931 Zamir, E., Katz, M., Posen, Y., Erez, N., Yamada, K.M., Katz, B.Z., Lin, S., Lin, D.C.,  
932 Bershadsky, A., Kam, Z., Geiger, B., 2000. Dynamics and segregation of cell-matrix  
933 adhesions in cultured fibroblasts. *Nat. Cell Biol.* 2, 191–196.  
934 <https://doi.org/10.1038/35008607>  
935
